# Supplementary material for: Rationale and performances of a data-driven method for computing the duration of pharmacological prescriptions using secondary data sources
Source: PubMed Central journal article supplement (PMC9012860; doi:10.1038/s41598-022-10144-9), 2022-04-15
Supplement: 41598_2022_10144_MOESM1_ESM.pdf [file 41598_2022_10144_MOESM1_ESM.pdf]

## Supplementary material

### Rationale and performances of a data-driven method for computing the duration of pharmacological prescriptions using secondary data sources

Laura Pazzagli<sup>1\*</sup>, David Liang<sup>2</sup>, Morten Andersen<sup>3</sup>, Marie Linder<sup>1</sup>, Abdul Rauf Khan<sup>3,4</sup>, Maurizio Sessa<sup>3</sup>

<sup>1</sup>Centre for Pharmacoepidemiology, Department of Medicine Solna, Karolinska Institutet, Stockholm, Sweden

<sup>2</sup>Ferring Pharmaceuticals, Copenhagen, Denmark

<sup>3</sup>Department of Drug Design and Pharmacology, University of Copenhagen, Copenhagen, Denmark

<sup>4</sup>Department of Applied Mathematics and Computer Science, Technical University of Denmark, Lyngby, Denmark.

#### \*Corresponding author

Laura Pazzagli. *ORCID*: <https://orcid.org/0000-0002-1908-6073>

Centre for Pharmacoepidemiology, Department of Medicine Solna, Karolinska Institutet S-171 76, Stockholm, Sweden.

E-mail: [laura.pazzagli@ki.se](mailto:laura.pazzagli@ki.se)

**Supplementary table 1.** Dosage recommendations in the Danish Summary of Product Characteristic (SmPC) for the 19 drugs under investigation.

| <b>Drug</b>   | <b>Approach</b> | <b>Dosage recommendations in the Danish SmPC</b>                                                                                                                                                                                                                                                                                                              |
|---------------|-----------------|---------------------------------------------------------------------------------------------------------------------------------------------------------------------------------------------------------------------------------------------------------------------------------------------------------------------------------------------------------------|
| Carbamazepine | 2 units per day | <b>Epilepsy</b><br><i>Adults and children &gt; 15 years.</i> Initially 100 mg twice daily Increase by 100 mg every 2 days to maintenance dose 300 mg twice-daily. Further increase to 800-1,200 mg daily may be necessary.                                                                                                                                    |
| Valproate     | 2 units per day | <b>Epilepsy</b><br><i>Adults.</i> Initially 600 mg daily as a single dose. The dose is increased to a maintenance dose of 600-1,200 mg daily divided into 1-2 doses.                                                                                                                                                                                          |
| Phenobarbital | 1 unit per day  | <b>Epilepsy</b><br><i>Adults.</i> 1-2 mg / kg body weight once daily at bedtime.                                                                                                                                                                                                                                                                              |
| Gabapentin    | 3 units per day | <b>Epilepsy</b><br><i>Adults</i><br>1st day 300 mg once daily. 2nd day 300 mg twice daily. 3rd day 300 mg 3 times a day.<br>Then step up with 300 mg daily every 2-3 days to a maximum of 3,600 mg daily in 3 divided doses.                                                                                                                                  |
| Lamotrigine   | 2 units per day | <b>Epilepsy</b><br><i>Adults and children &gt; 13 years.</i> Initially 25 mg once daily for 2 weeks. Then 50 mg once daily for 2 weeks. Thereafter, the dose is increased by 50-100 mg every one or two weeks for optimal clinical response. Usual maintenance dose 100-300 mg daily in 1 or 2 doses. Some patients need higher doses, eg 500-1,200 mg daily. |
| Levetiracetam | 2 units per day | <b>Epilepsy</b><br><i>Adults and children &gt; 16 years.</i> Initially 250 mg twice daily.<br>After 2 weeks the dose can be increased to 500 mg twice daily. The dose can be increased by a further 250 mg twice daily every 2 weeks to a maximum of 1.5 g twice daily.                                                                                       |
| Pregabalin    | 3 units per day | <b>Epilepsy</b><br><i>Adults.</i> Initially 150 mg daily divided into 2-3 doses. The dose can be increased to 300 mg daily after 7 days and to a maximum of 600 mg daily after other 7 days.                                                                                                                                                                  |
| Topiramate    | 2 units per day | <b>Epilepsy</b><br><i>Adults.</i> Initially 25 mg daily in the evening for 1 week. Then the dose is increased at 1-2-week intervals by 25-50 mg per day divided into 2 doses depending on the effect. Usual maintenance dose 200-400 mg daily divided into 2 doses.                                                                                           |
| Zonisamide    | 1 unit per day  | <b>Epilepsy</b><br><i>Adults.</i> Initially 100 mg once daily.<br>After 2 weeks, the dose can be increased to 200 mg once daily. After a further 2 weeks, the dose may be increased to 300 mg once daily. Usual maintenance dose 300 mg once daily.                                                                                                           |
| Clobazam      | 2 units per day | <b>Epilepsy</b><br><i>Adults.</i> 10-40 (-80) mg daily in 1-3 doses.                                                                                                                                                                                                                                                                                          |

|               |                 |                                                                                                                                                              |
|---------------|-----------------|--------------------------------------------------------------------------------------------------------------------------------------------------------------|
| Clonazepam    | 2 units per day | <b>Epilepsy</b><br><i>Adults.</i> Initially 0.5 mg daily, increase by 0.5 mg every 3 days to a maximum of 6 mg per day in 1-2 doses.                         |
| Theophylline  | 2 units per day | <b>Asthma or chronic obstructive pulmonary disease</b><br><i>Adults.</i> Individual dosage. 10-15 mg / kg body weight per day, usually divided into 2 doses. |
| Flecainide    | 2 units per day | <b>Cardiac arrhythmia</b><br><i>Older patients.</i> 100 mg twice daily Dose reduction after 5-6 days.                                                        |
| Propafenone   | 2 units per day | <b>Cardiac arrhythmia</b><br><i>Older patients.</i> 300 mg daily divided into 2 doses with dose adjustment after 3-4 days. Careful monitoring.               |
| Amitriptyline | 2 units per day | <b>Depression</b><br><i>Older patients.</i> Initially 10 mg twice daily, gradually increasing to 100-150 mg daily in 1-2 doses.                              |
| Citalopram    | 1 unit per day  | <b>Depression</b><br><i>Older patients.</i> Initially 10 mg daily Maximum 20 mg daily Dose increase should be done slowly under close supervision.           |
| Clomipramine  | 1 unit per day  | <b>Depression</b><br><i>Older patients.</i> Initially 10 mg daily, increasing to normally 30-50 mg daily.                                                    |
| Mirtazapine   | 1 unit per day  | <b>Depression</b><br><i>Older patients.</i> Initially 15-30 mg daily. The usual maintenance dose is 15-45 mg daily. The dose is given once a day at bedtime. |
| Nortriptyline | 2 units per day | <b>Depression</b><br><i>Older patients.</i> Initially 10 mg twice daily, gradually increasing to 75 mg daily in 1-2 doses.                                   |

**Supplementary table 2.** Baseline characteristics of individuals with and without plasma concentration measurements for the 19 cohorts. *N= Number of patients; Plasma concentration measurement (PCM); Interquartile Range (IQR)*

|                                           | Age (median – IQR) | % Female sex | % Enrolled in 1995 |
|-------------------------------------------|--------------------|--------------|--------------------|
| <b>Carbamazepine</b>                      |                    |              |                    |
| <i>Individuals without PCM (N=29,161)</i> | 60.3 (52.3 – 69.0) | 49.8         | 62.5               |
| <i>Individuals with PCM (N=6,923)</i>     | 51.9 (47.1 – 59.0) | 49.3         | 74.5               |
| <b>Valproate</b>                          |                    |              |                    |
| <i>Individuals without PCM (N=62,009)</i> | 70.4 (62.3 – 77.9) | 49.9         | 15.2               |
| <i>Individuals with PCM (N=20,078)</i>    | 66.7 (59.0 – 77.2) | 44.2         | 13.8               |
| <b>Phenobarbital</b>                      |                    |              |                    |
| <i>Individuals without PCM (N=24,744)</i> | 64.4 (56.5 – 72.9) | 47.1         | 38.2               |
| <i>Individuals with PCM (N=2,612)</i>     | 55.1 (48.7 – 63.5) | 44.0         | 52.2               |
| <b>Gabapentin</b>                         |                    |              |                    |
| <i>Individuals without PCM (N=23,162)</i> | 69.0 (62.3 – 75.8) | 51.8         | 0                  |
| <i>Individuals with PCM (N=531)</i>       | 66.9 (53.3 – 70.2) | 78.5         | 0                  |
| <b>Lamotrigine</b>                        |                    |              |                    |
| <i>Individuals without PCM (N=59,049)</i> | 67.5 (59.1 – 75.5) | 50.8         | 9.2                |
| <i>Individuals with PCM (N=24,471)</i>    | 64.6 (57.6 – 72.2) | 50.2         | 7.8                |
| <b>Levetiracetam</b>                      |                    |              |                    |
| <i>Individuals without PCM (N=36,886)</i> | 69.1 (63.7 – 76.2) | 47.6         | 0                  |
| <i>Individuals with PCM (N=24,879)</i>    | 69.1 (63.5 – 75.3) | 49.7         | 0                  |
| <b>Pregabalin</b>                         |                    |              |                    |
| <i>Individuals without PCM (N=7,492)</i>  | 69.2 (64.1 – 75.5) | 59.0         | 0                  |
| <i>Individuals with PCM (N=132)</i>       | 68.4 (64.8 – 71.1) | 77.3         | 0                  |
| <b>Topiramate</b>                         |                    |              |                    |
| <i>Individuals without PCM (N=13,448)</i> | 60.6 (54.2 – 67.9) | 56.8         | 0                  |
| <i>Individuals with PCM (N=3,053)</i>     | 57.9 (52.3 – 63.1) | 54.3         | 0                  |
| <b>Zonisamide</b>                         |                    |              |                    |
| <i>Individuals without PCM (N=4,360)</i>  | 65.5 (60.6 – 71.8) | 59.2         | 0                  |
| <i>Individuals with PCM (N=2,049)</i>     | 69.0 (63.9 – 74.1) | 56.8         | 0                  |
| <b>Flecainide</b>                         |                    |              |                    |
| <i>Individuals without PCM (N=8,037)</i>  | 66.9 (61.4 – 72.8) | 46.1         | 19.1               |
| <i>Individuals with PCM (N=206)</i>       | 65.8 (61.2 – 69.6) | 46.1         | 3.4                |
| <b>Propafenone</b>                        |                    |              |                    |
| <i>Individuals without PCM (N=6,423)</i>  | 65.4 (56.8 – 69.8) | 50.0         | 11.1               |
| <i>Individuals with PCM (N=64)</i>        | 68.7 (61.6 – 75.1) | 44.6         | 26.8               |

|                                           |                    |      |      |
|-------------------------------------------|--------------------|------|------|
| <b>Theophylline</b>                       |                    |      |      |
| <i>Individuals without PCM (N=59,436)</i> | 71.4 (64.3 – 77.9) | 53.7 | 52.2 |
| <i>Individuals with PCM (N=156)</i>       | 62.7 (55.7 – 70.1) | 66.7 | 51.3 |
| <b>Amitriptyline</b>                      |                    |      |      |
| <i>Individuals without PCM (N=10,503)</i> | 71.8 (63.5 – 78.7) | 73.2 | 21.3 |
| <i>Individuals with PCM (N=86)</i>        | 64.1 (60.0 – 67.4) | 61.6 | 23.3 |
| <b>Citalopram</b>                         |                    |      |      |
| <i>Individuals without PCM (N=49,922)</i> | 75.7 (67.7 – 82.5) | 69.0 | 12.3 |
| <i>Individuals with PCM (N=208)</i>       | 77.8 (69.6 – 81.8) | 79.3 | 7.2  |
| <b>Clomipramine</b>                       |                    |      |      |
| <i>Individuals without PCM (N=2,377)</i>  | 66.3 (59.1 – 73.6) | 78.3 | 43.5 |
| <i>Individuals with PCM (N=46)</i>        | 68.1 (52.8 – 73.2) | 50.0 | 19.6 |
| <b>Mirtazapine</b>                        |                    |      |      |
| <i>Individuals without PCM (N=42,753)</i> | 78.5 (71.0 – 84.2) | 69.5 | 0    |
| <i>Individuals with PCM (N=98)</i>        | 80.2 (69.7 – 81.3) | 67.3 | 0    |
| <b>Nortriptyline</b>                      |                    |      |      |
| <i>Individuals without PCM (N=7,067)</i>  | 72.3 (64.7 – 79.1) | 73.7 | 17.2 |
| <i>Individuals with PCM (N=663)</i>       | 71.1 (63.4 – 78.0) | 71.2 | 5.6  |
| <b>Clobazam</b>                           |                    |      |      |
| <i>Individuals without PCM (N=24,090)</i> | 66.1 (59.3 – 72.7) | 50.5 | 8.8  |
| <i>Individuals with PCM (N=2262)</i>      | 63.4 (55.2 – 68.8) | 51.8 | 10.5 |
| <b>Clonazepam</b>                         |                    |      |      |
| <i>Individuals without PCM (N=18,895)</i> | 62.6 (54.4 – 70.3) | 54.0 | 21.6 |
| <i>Individuals with PCM (N=723)</i>       | 53.4 (46.6 – 65.5) | 62.8 | 42.5 |

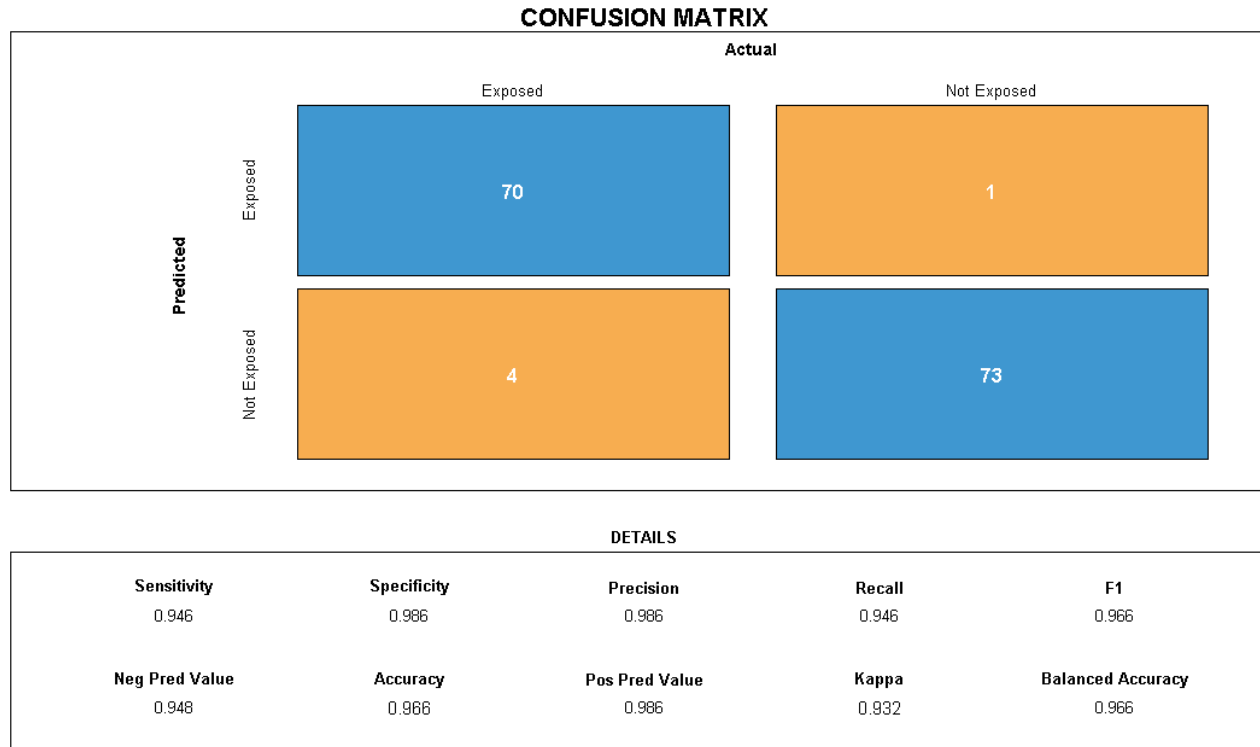

**Supplementary figure 1.** Results of the confusion matrix when comparing “true” versus assessed exposure status (by Sessa Empirical Estimator) after balancing “true” positives.

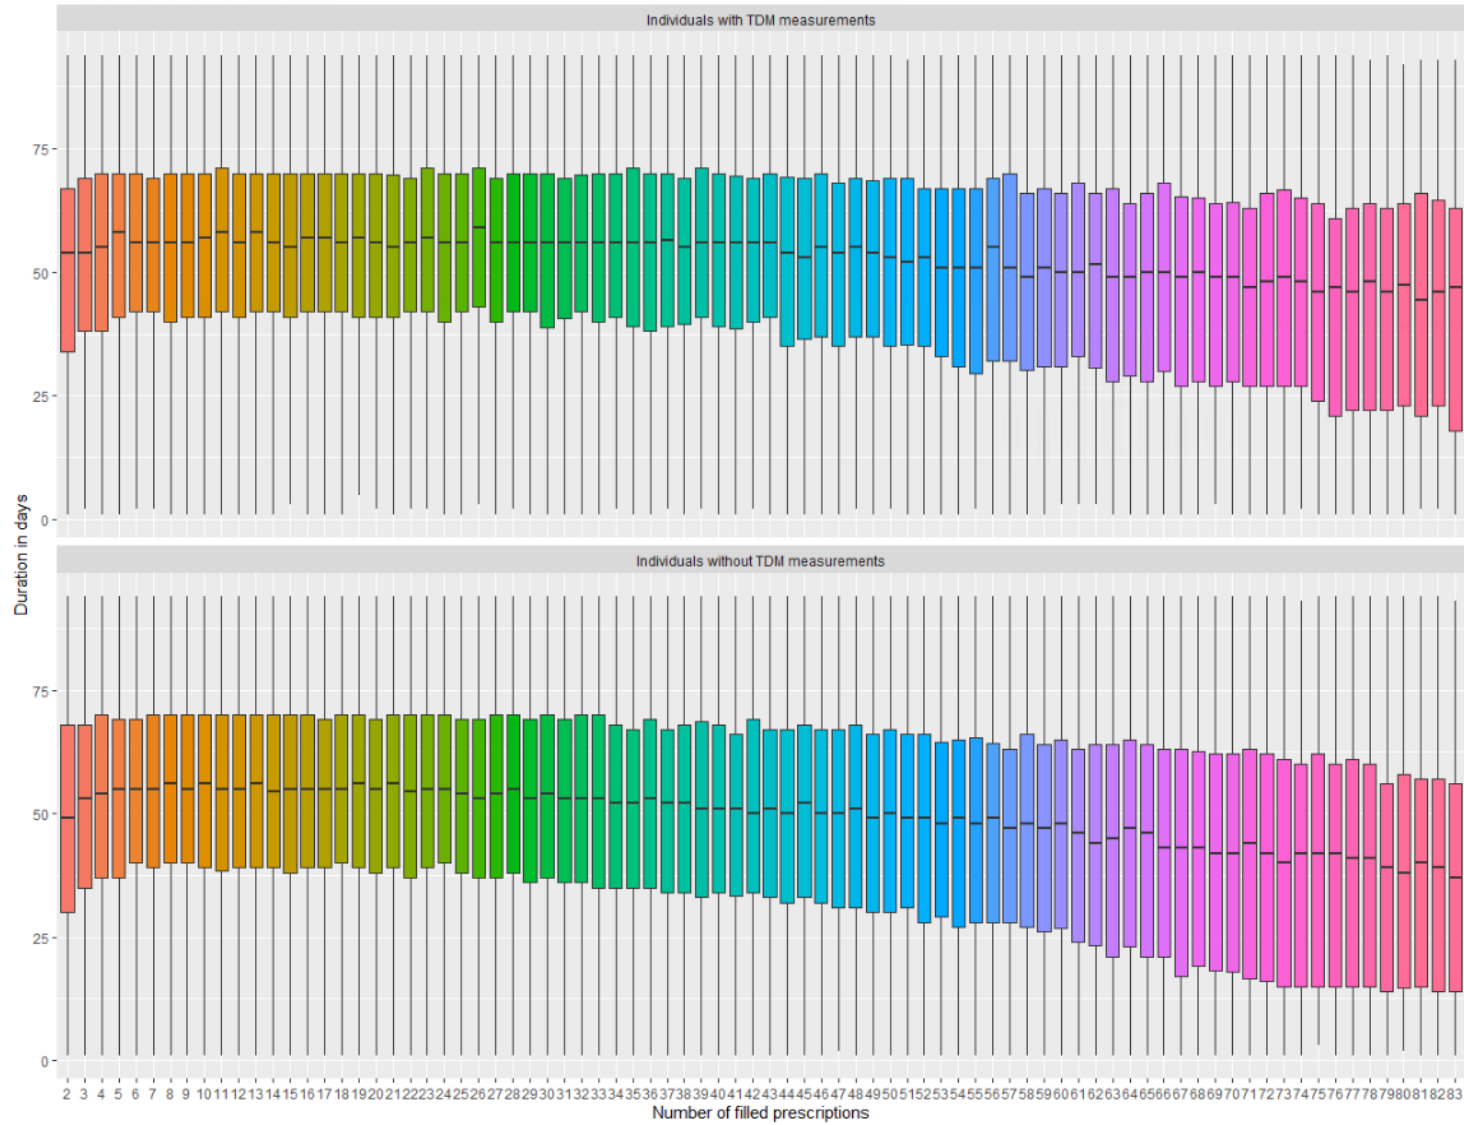

**Supplementary figure 2.** Median duration of the temporal distances between consecutive prescriptions for carbamazepine. *TDM = therapeutic drug monitoring.*

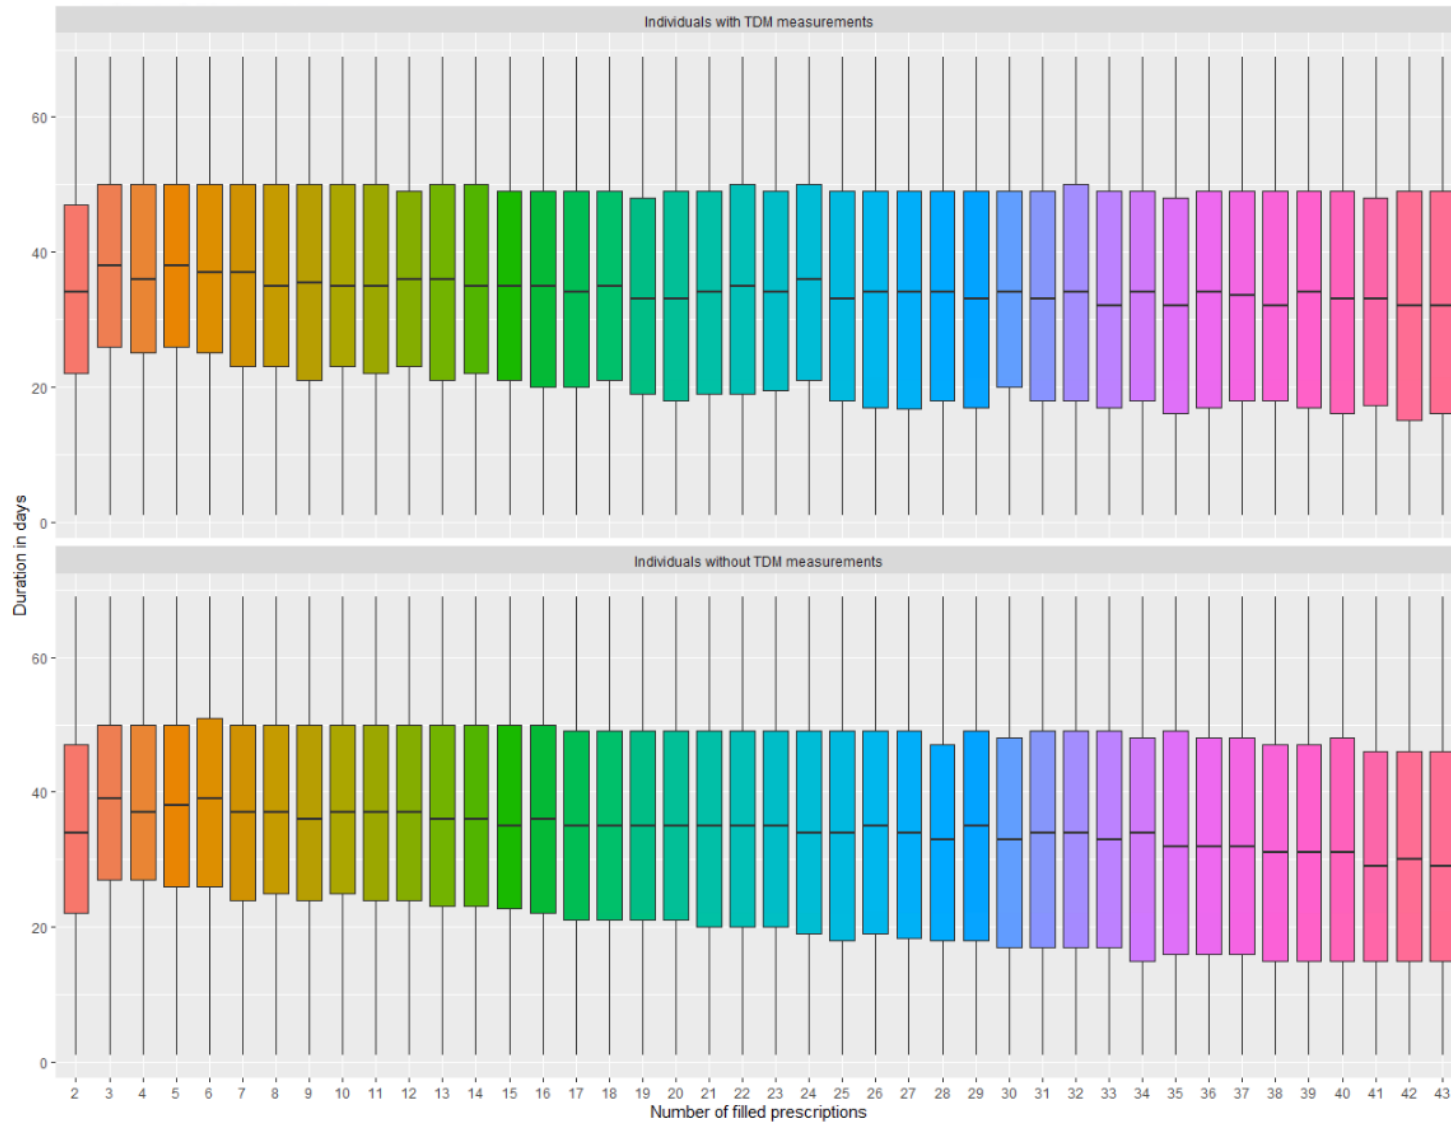

**Supplementary figure 3.** Median duration of the temporal distances between consecutive prescriptions for valproate. *TDM = therapeutic drug monitoring.*



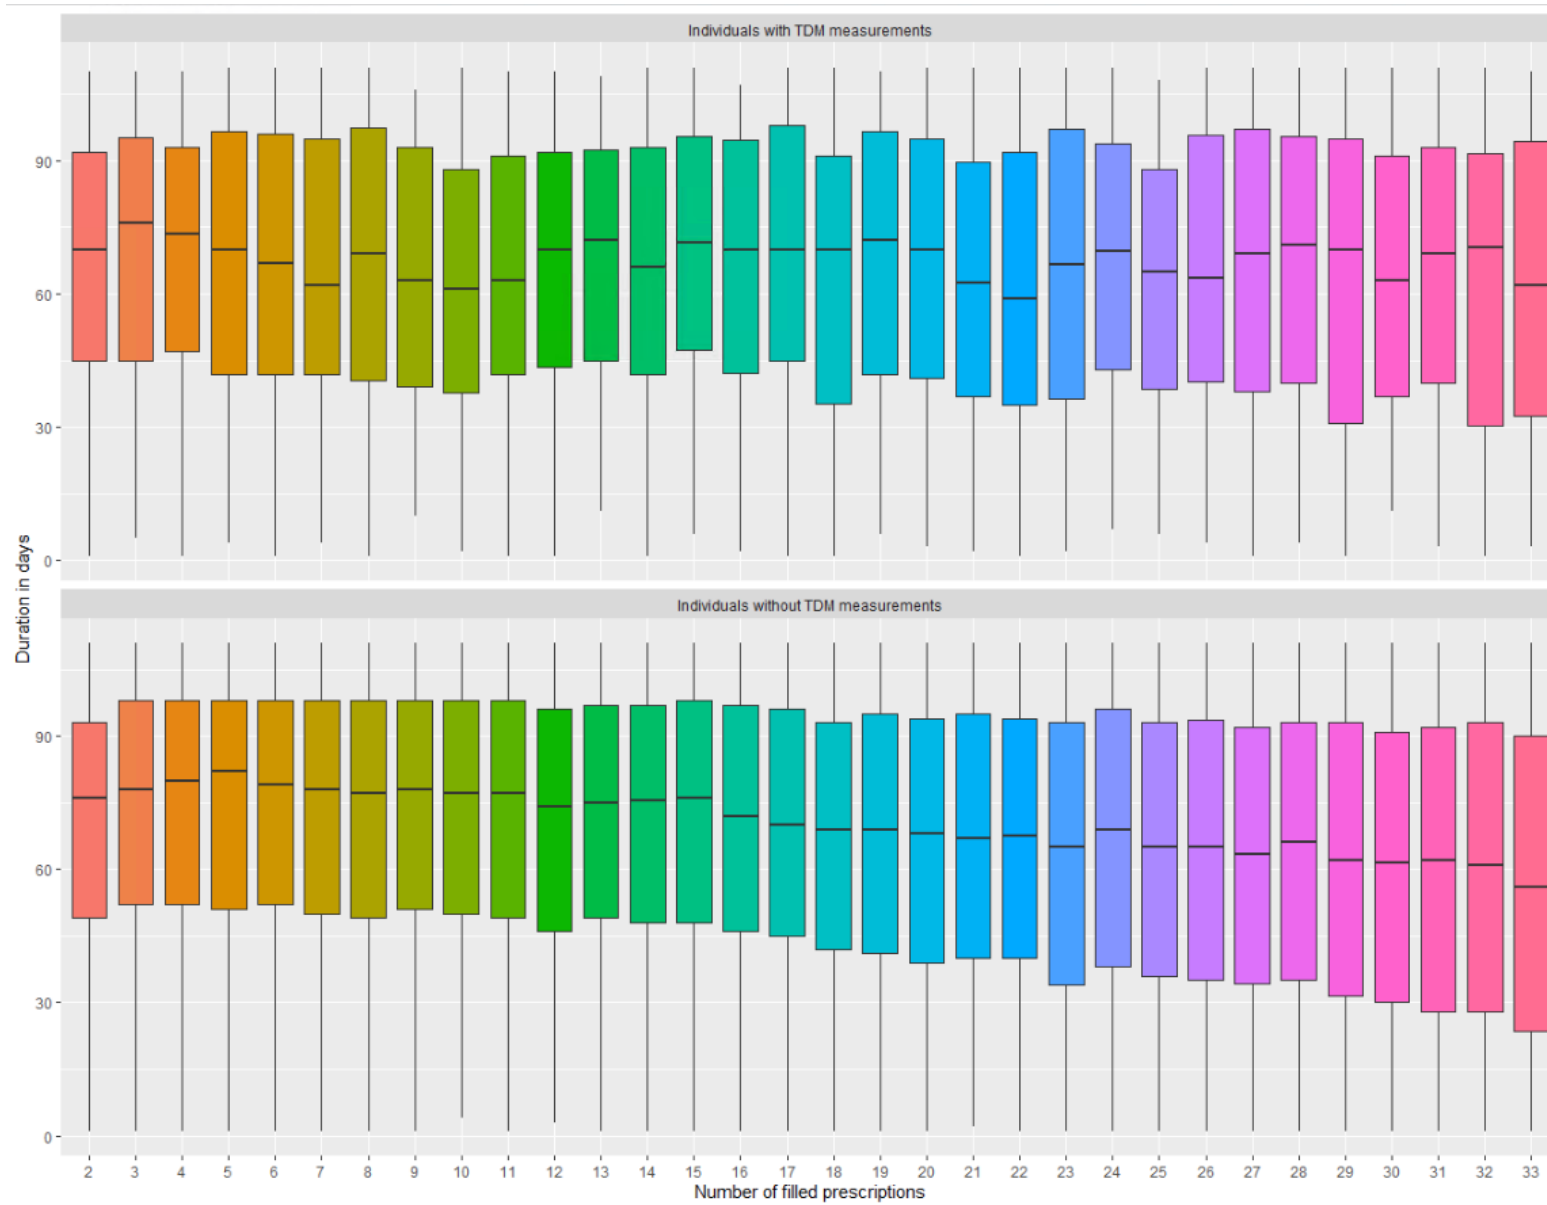

**Supplementary figure 4.** Median duration of the temporal distances between consecutive prescriptions for phenobarbital. *TDM = therapeutic drug monitoring.*

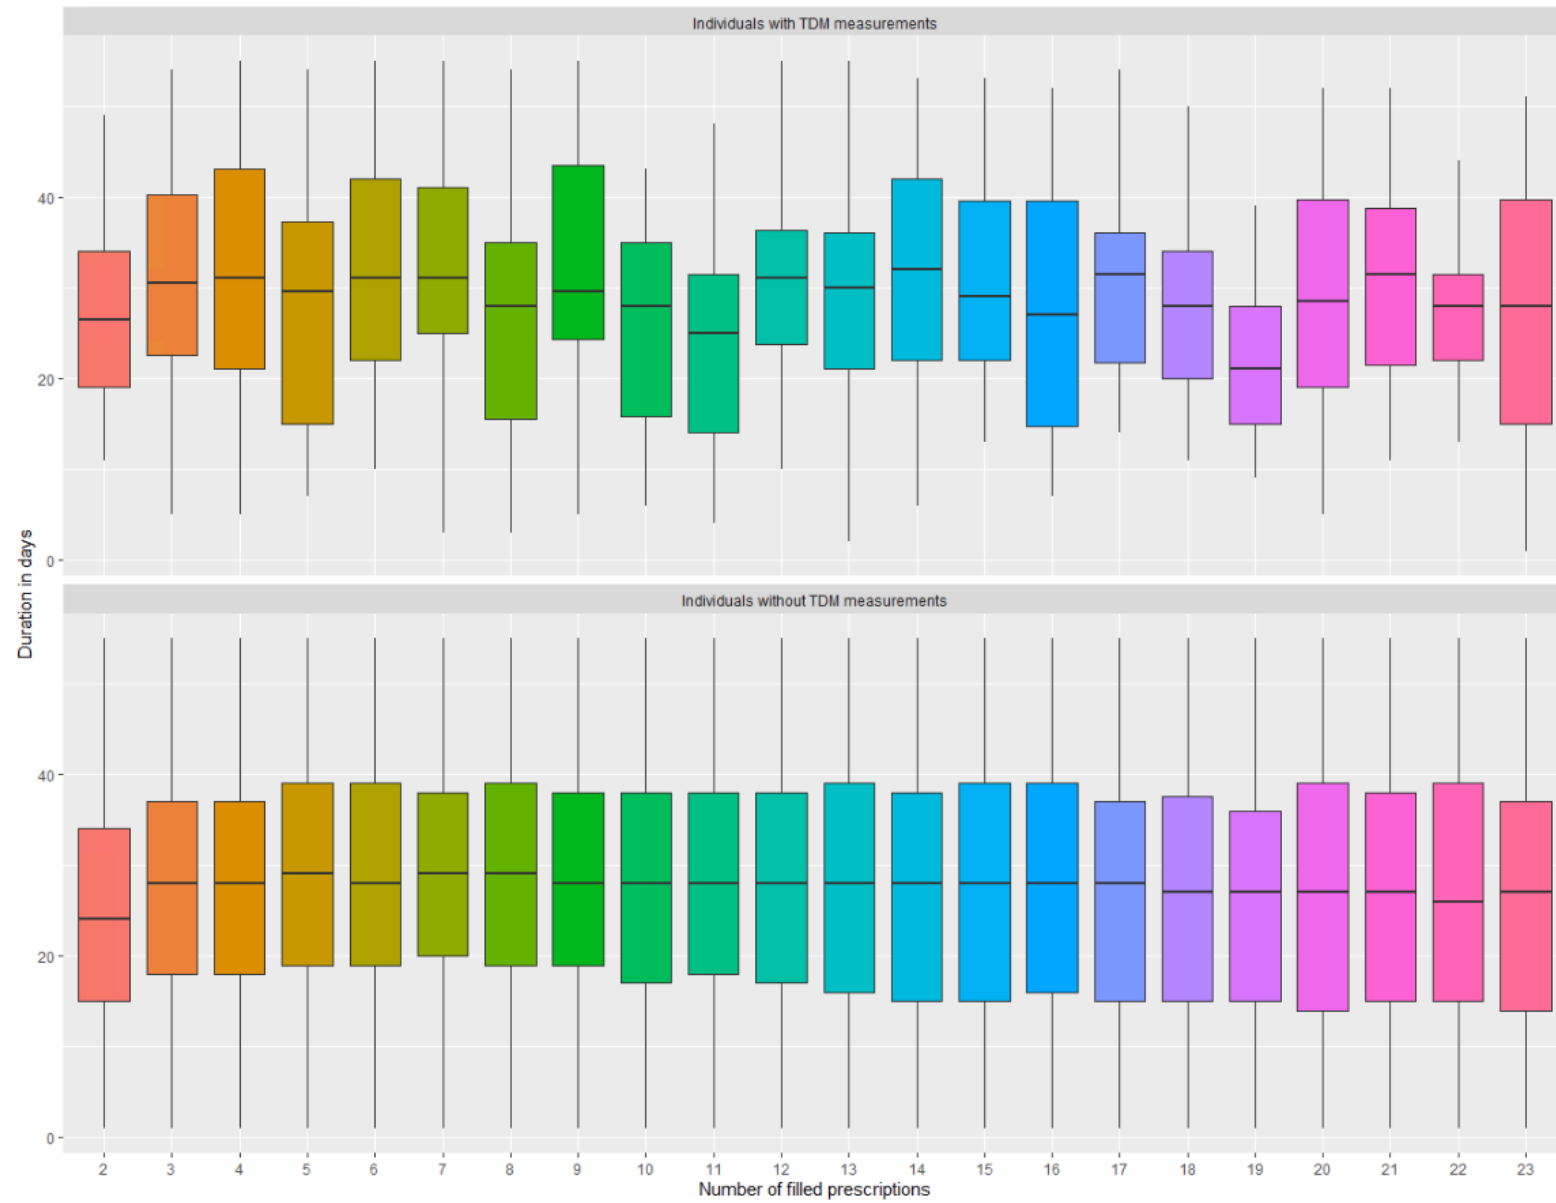

**Supplementary figure 5.** Median duration of the temporal distances between consecutive prescriptions for gabapentin. *TDM = therapeutic drug monitoring.*

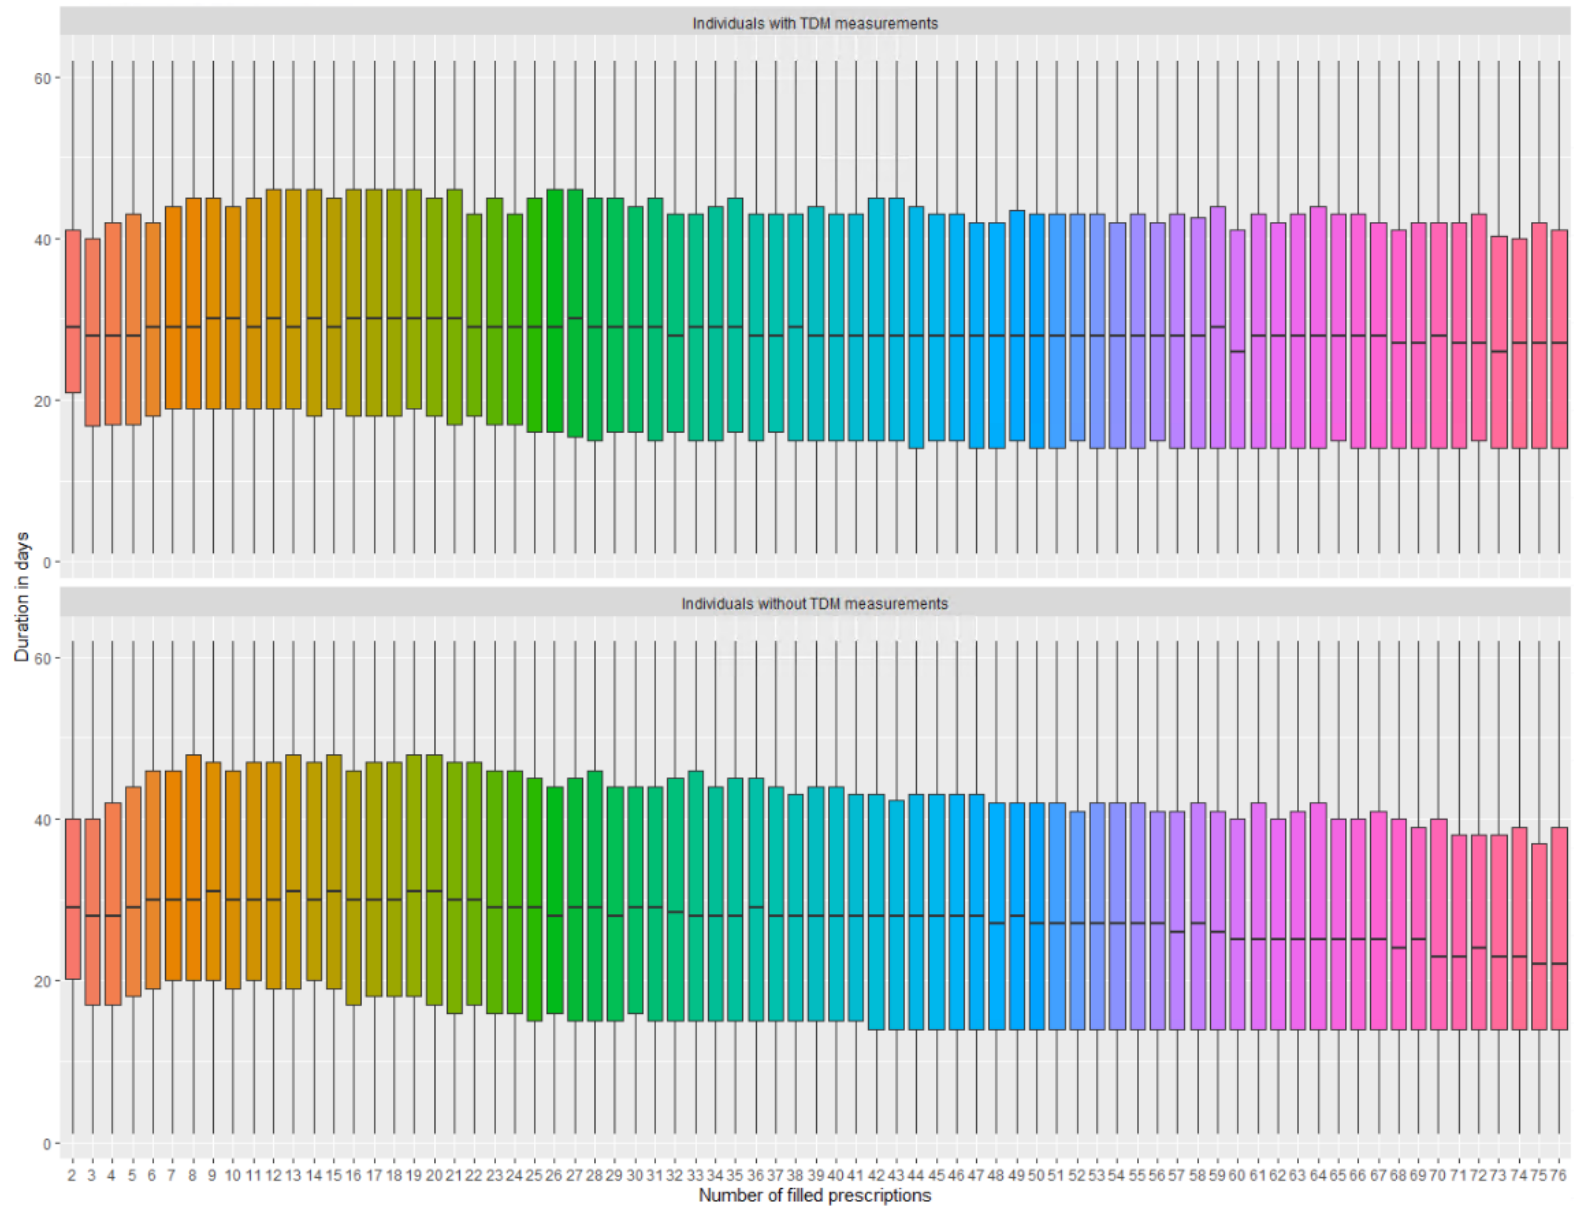

**Supplementary figure 6.** Median duration of the temporal distances between consecutive prescriptions for lamotrigine. *TDM = therapeutic drug monitoring.*

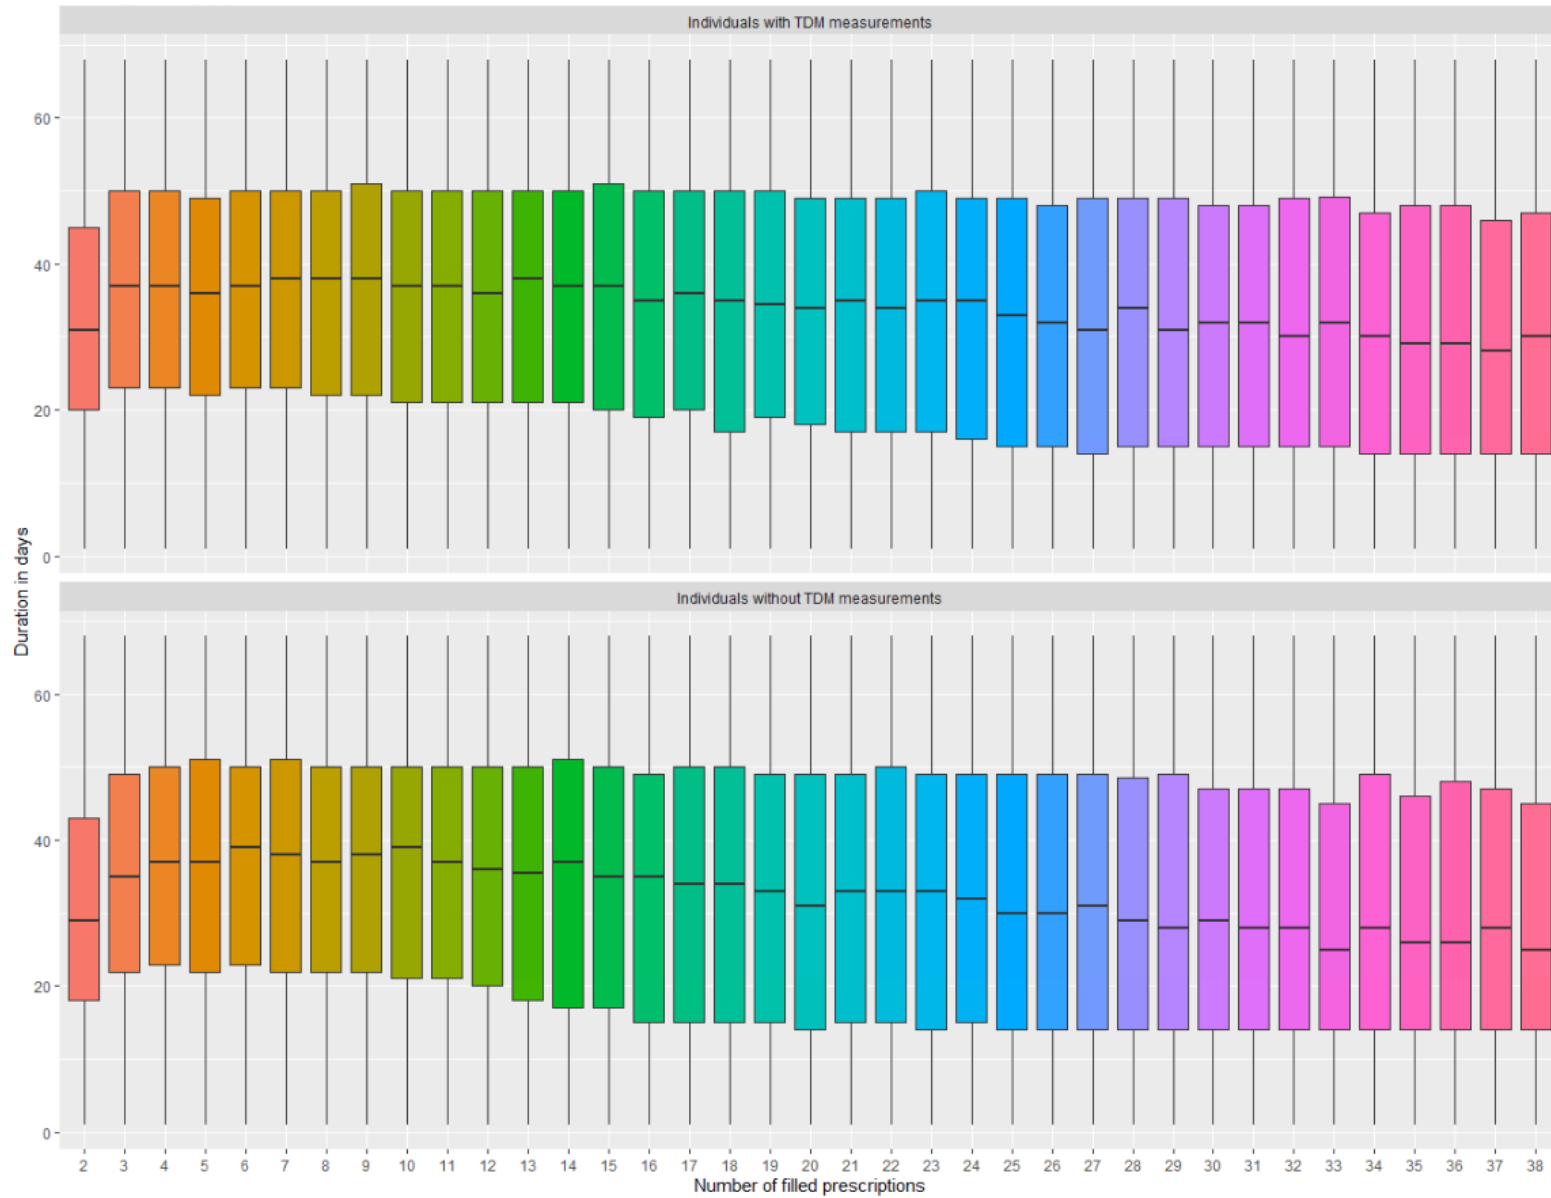

**Supplementary figure 7.** Median duration of the temporal distances between consecutive prescriptions for levetiracetam. *TDM = therapeutic drug monitoring.*

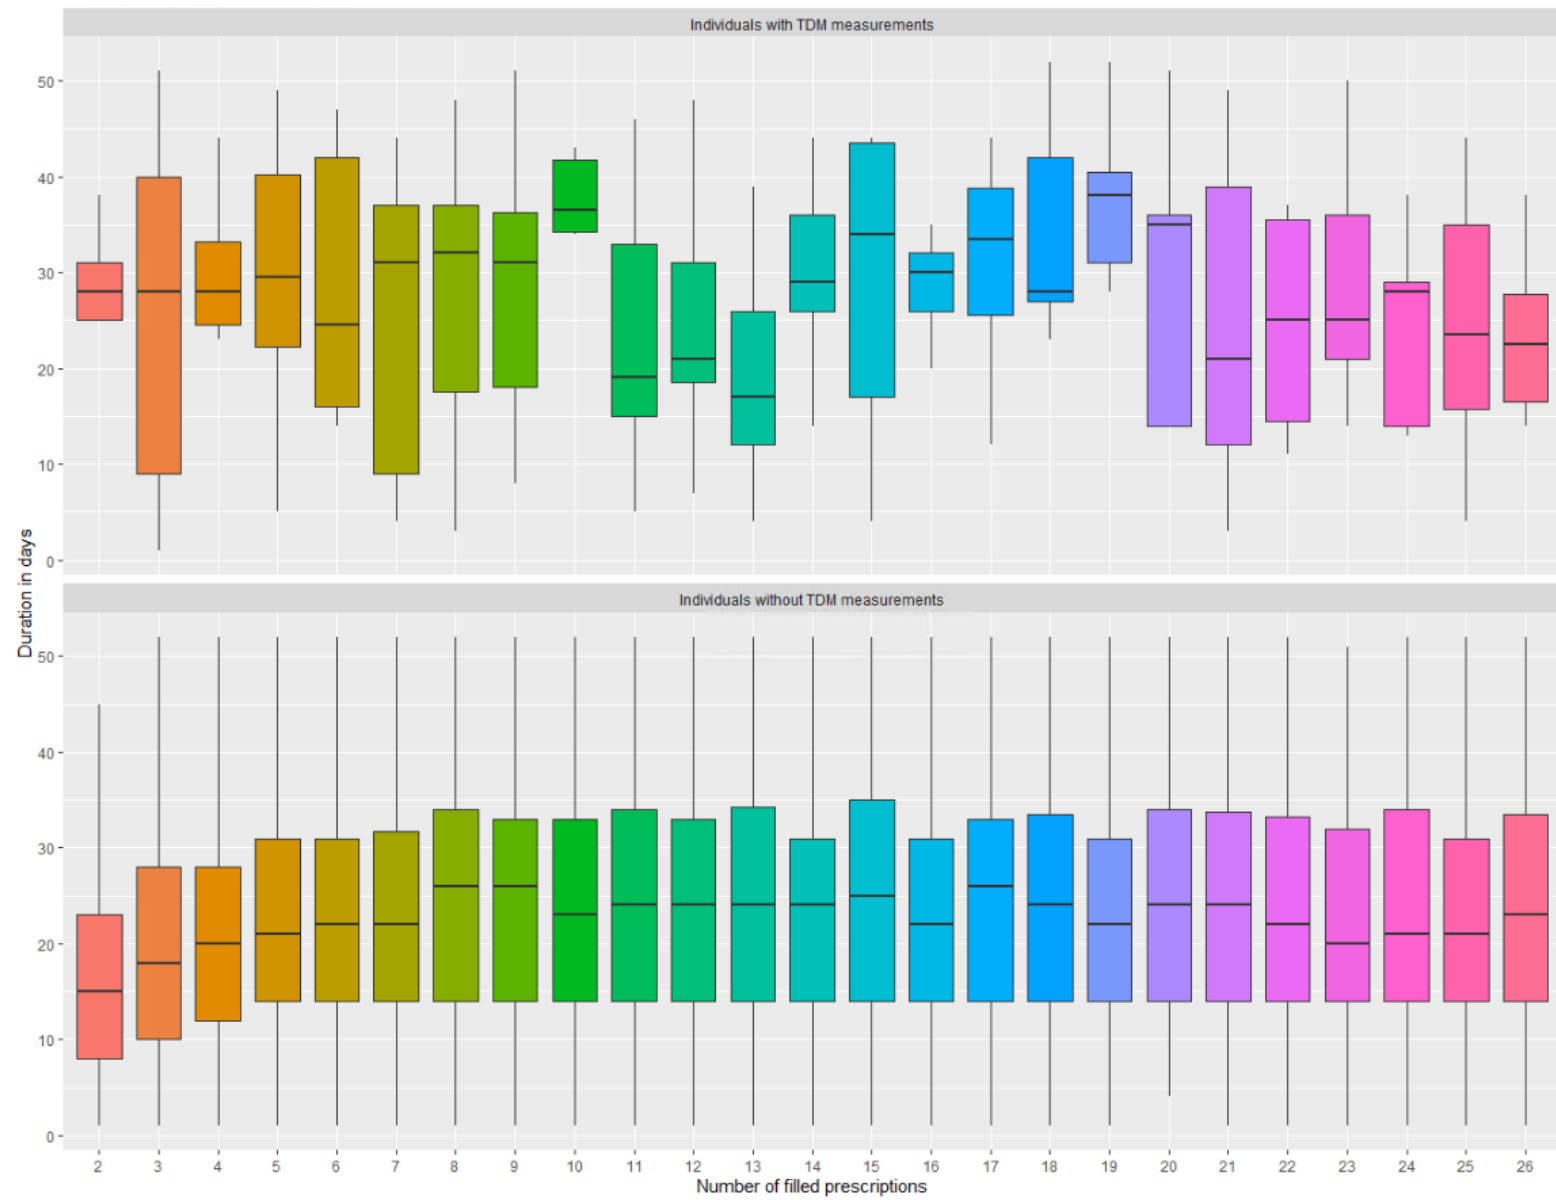

**Supplementary figure 8.** Median duration of the temporal distances between consecutive prescriptions for pregabalin. *TDM = therapeutic drug monitoring.*

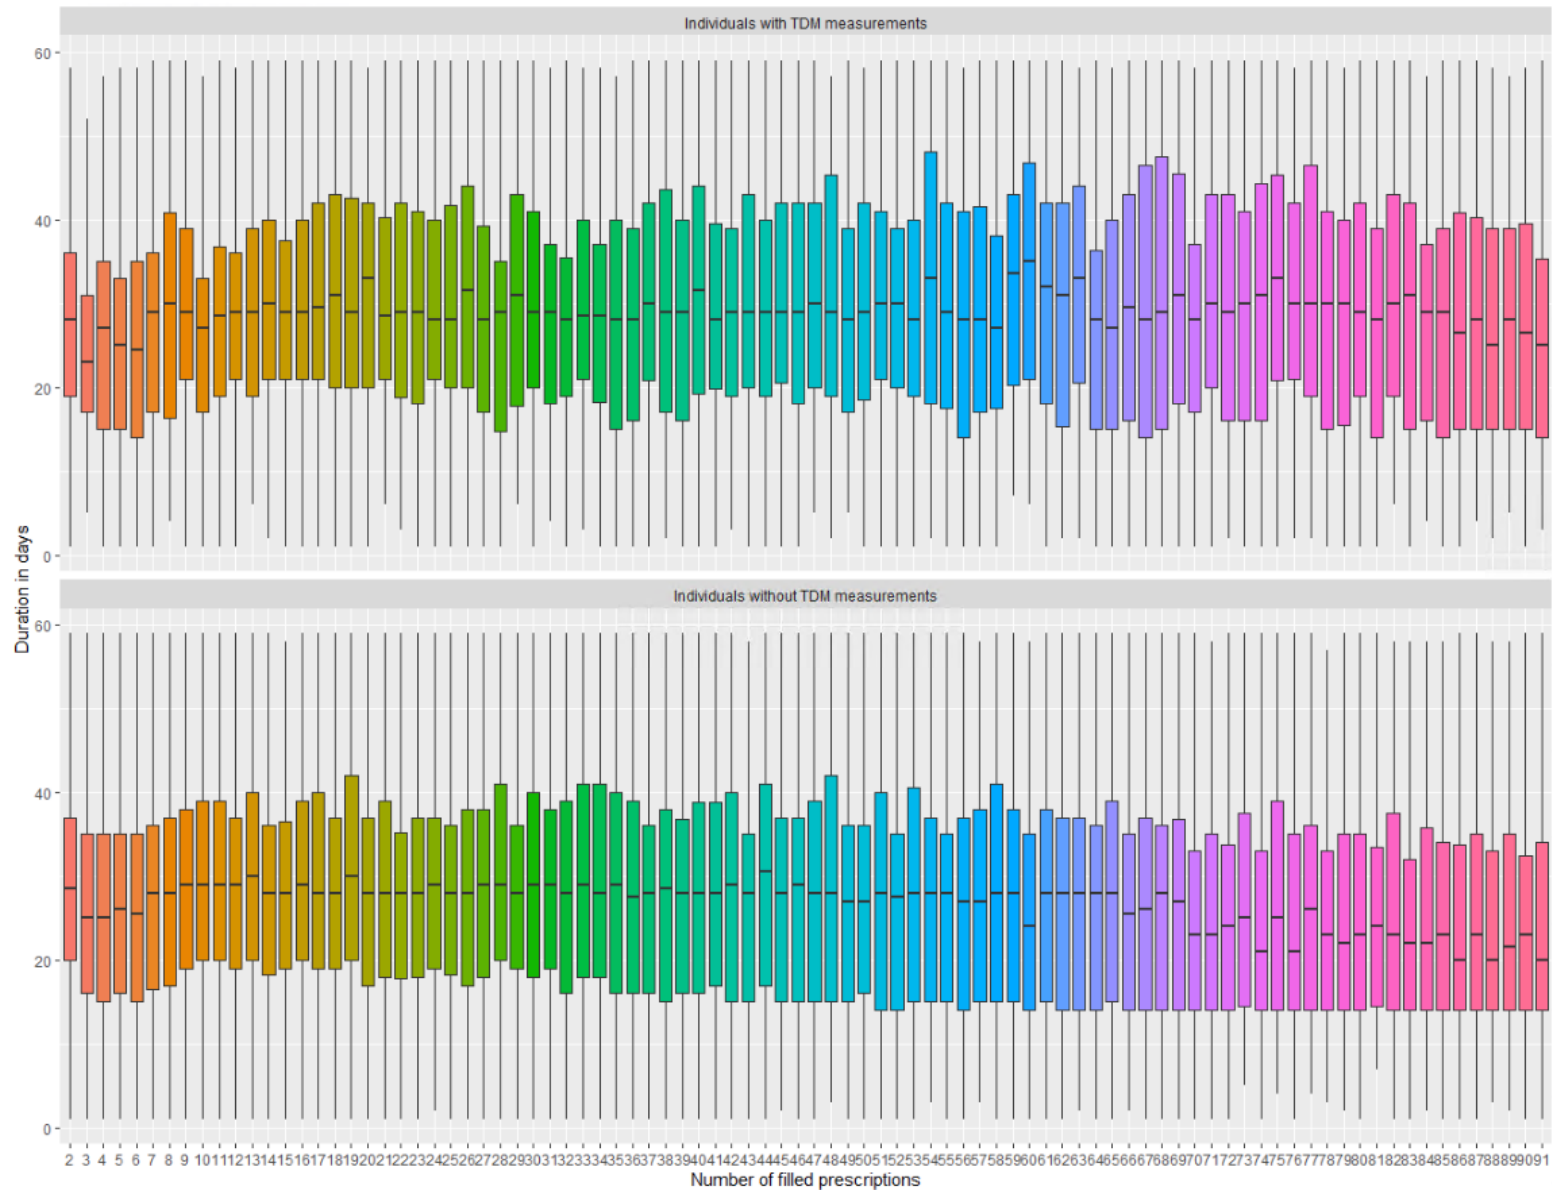

**Supplementary figure 9.** Median duration of the temporal distances between consecutive prescriptions for topiramate. *TDM = therapeutic drug monitoring.*

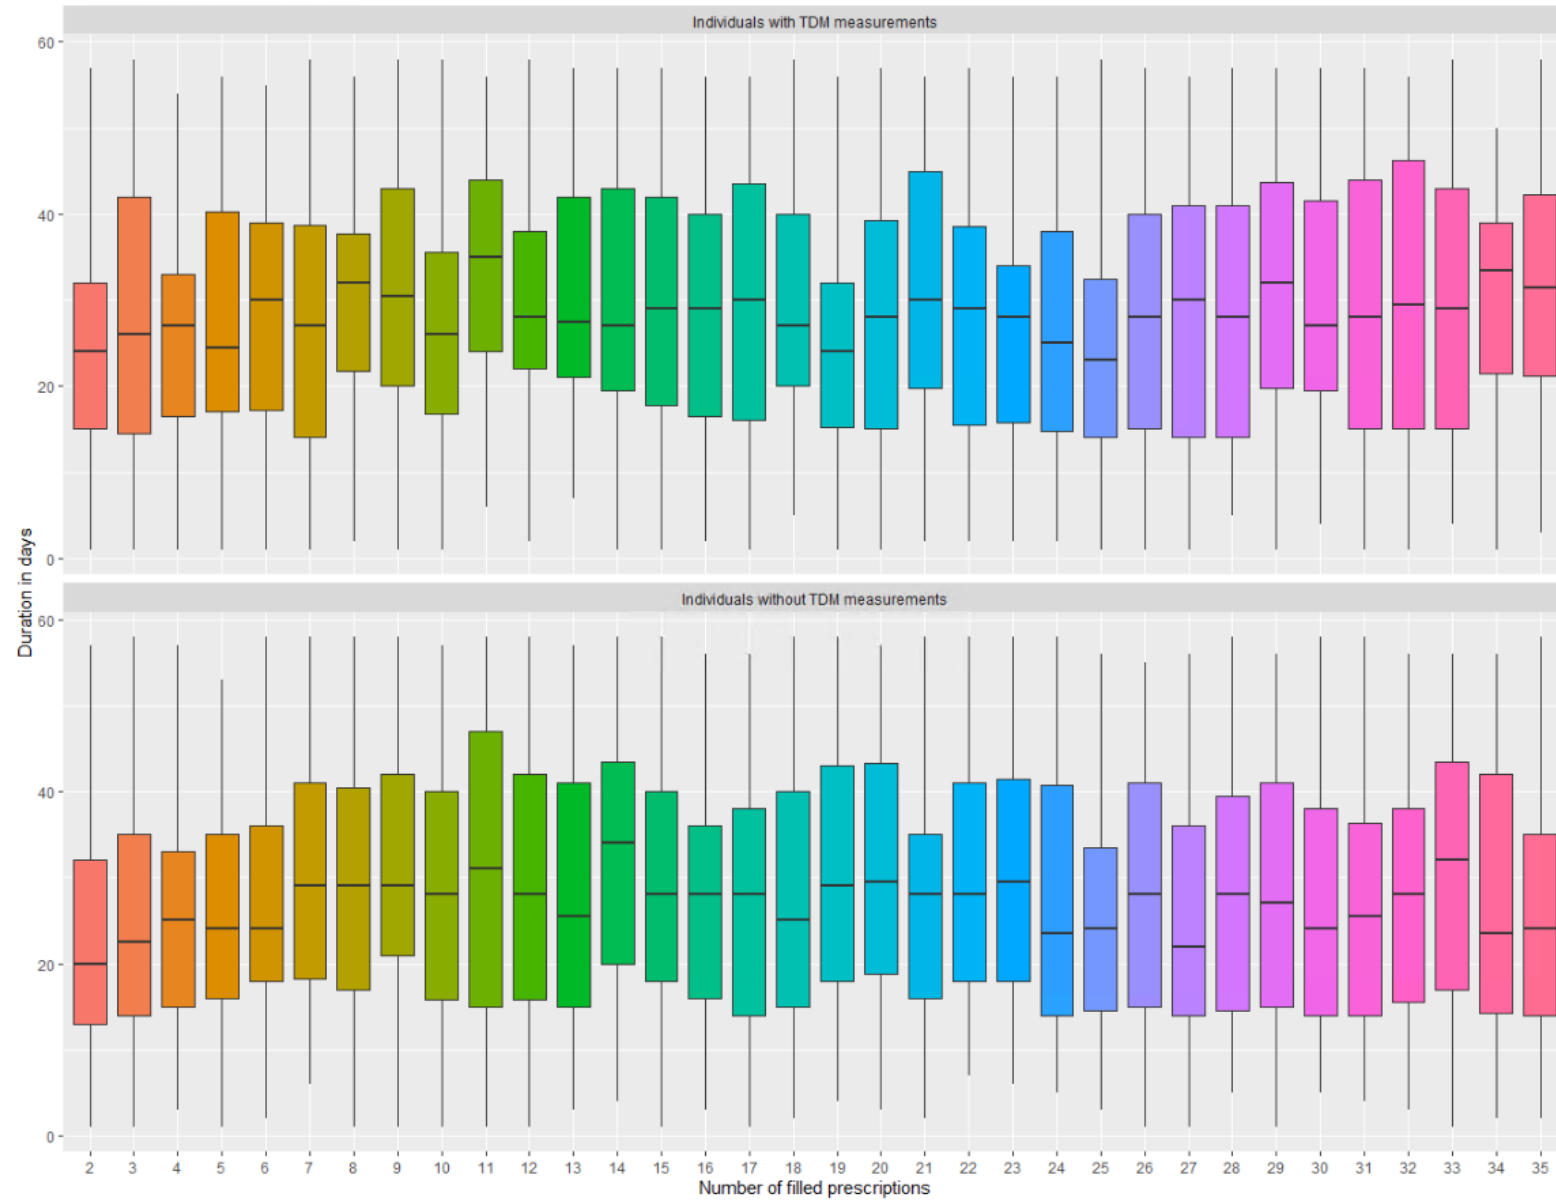

**Supplementary figure 10.** Median duration of the temporal distances between consecutive prescriptions for zonisamide. *TDM = therapeutic drug monitoring.*

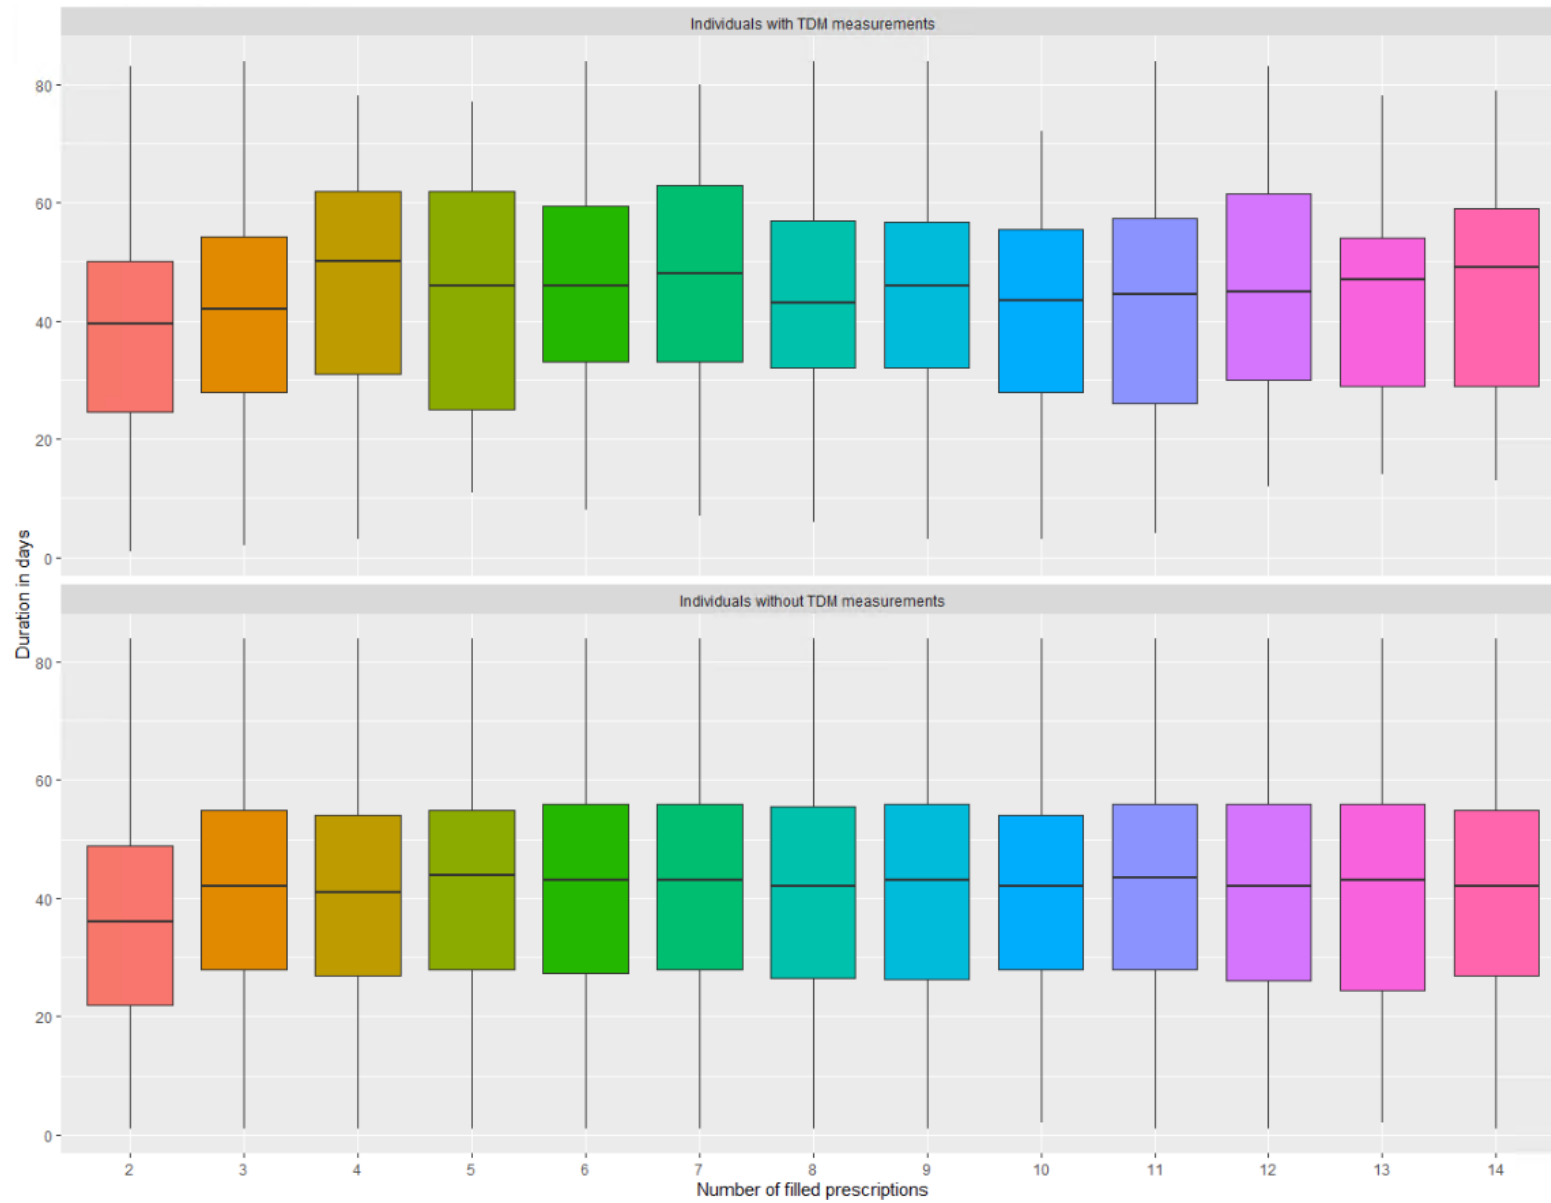

**Supplementary figure 11.** Median duration of the temporal distances between consecutive prescriptions for clobazam. *TDM = therapeutic drug monitoring.*



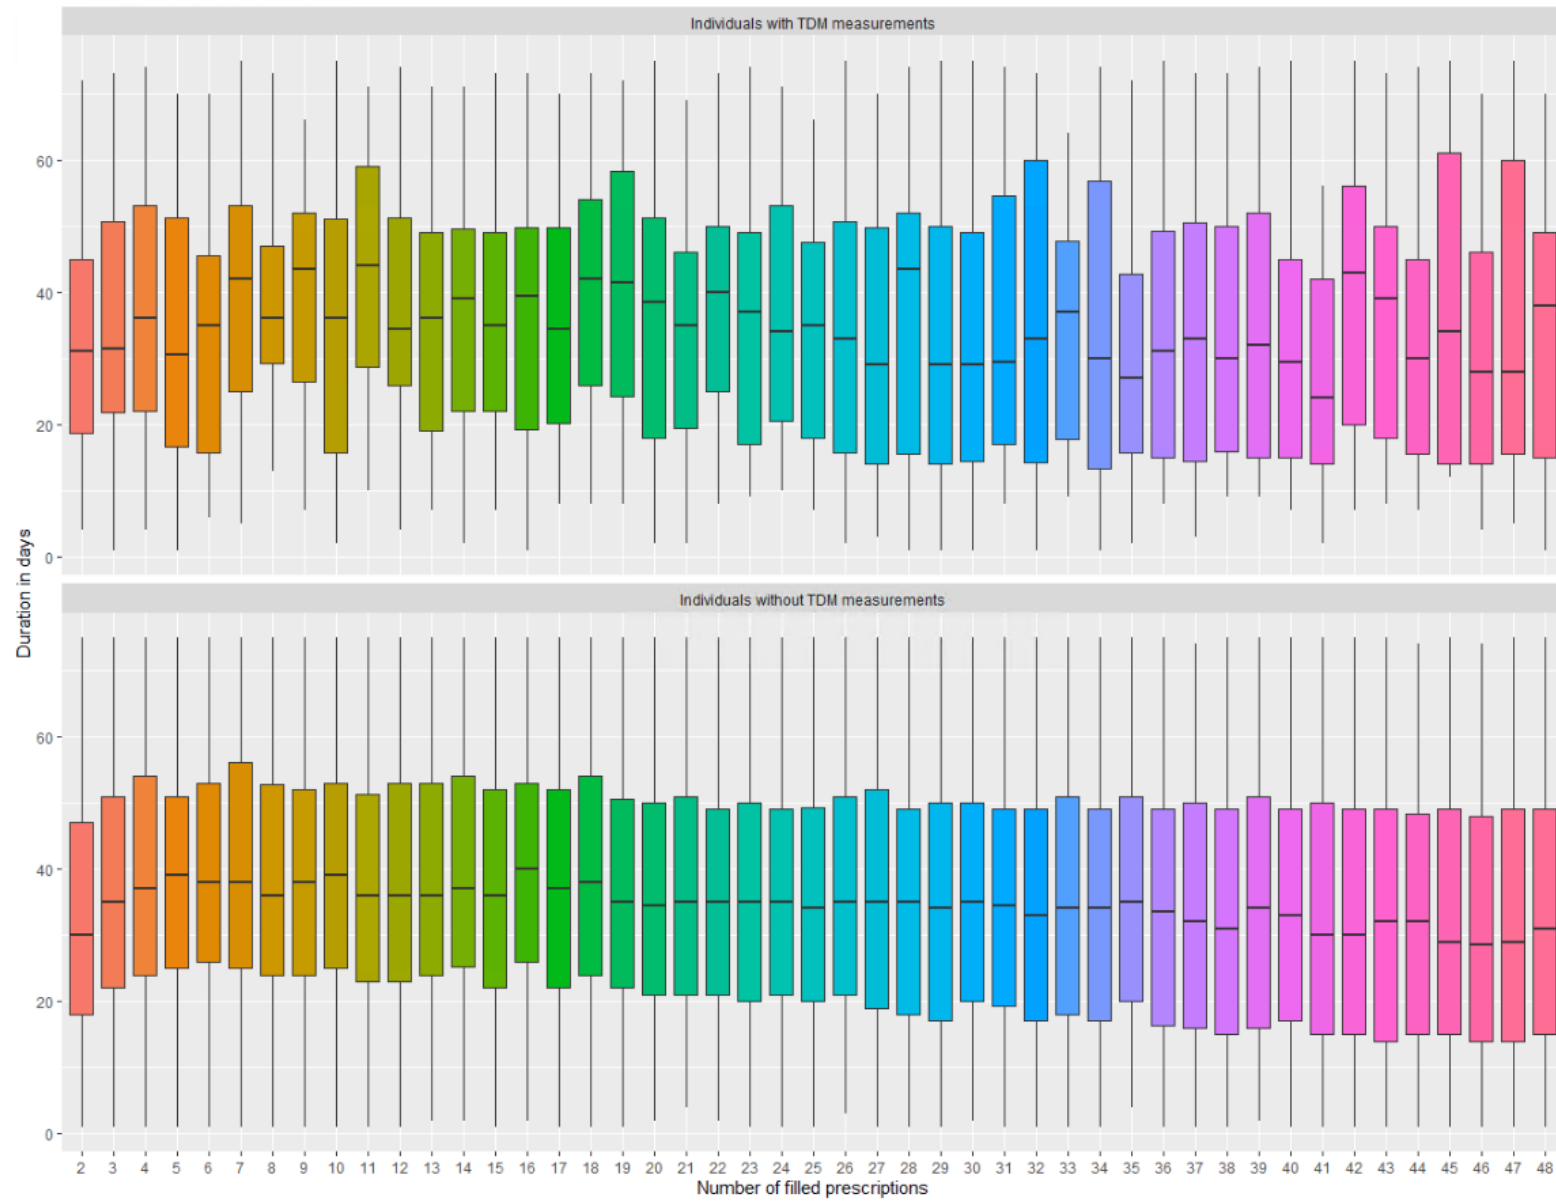

**Supplementary figure 12.** Median duration of the temporal distances between consecutive prescriptions for clonazepam. *TDM* = therapeutic drug monitoring.

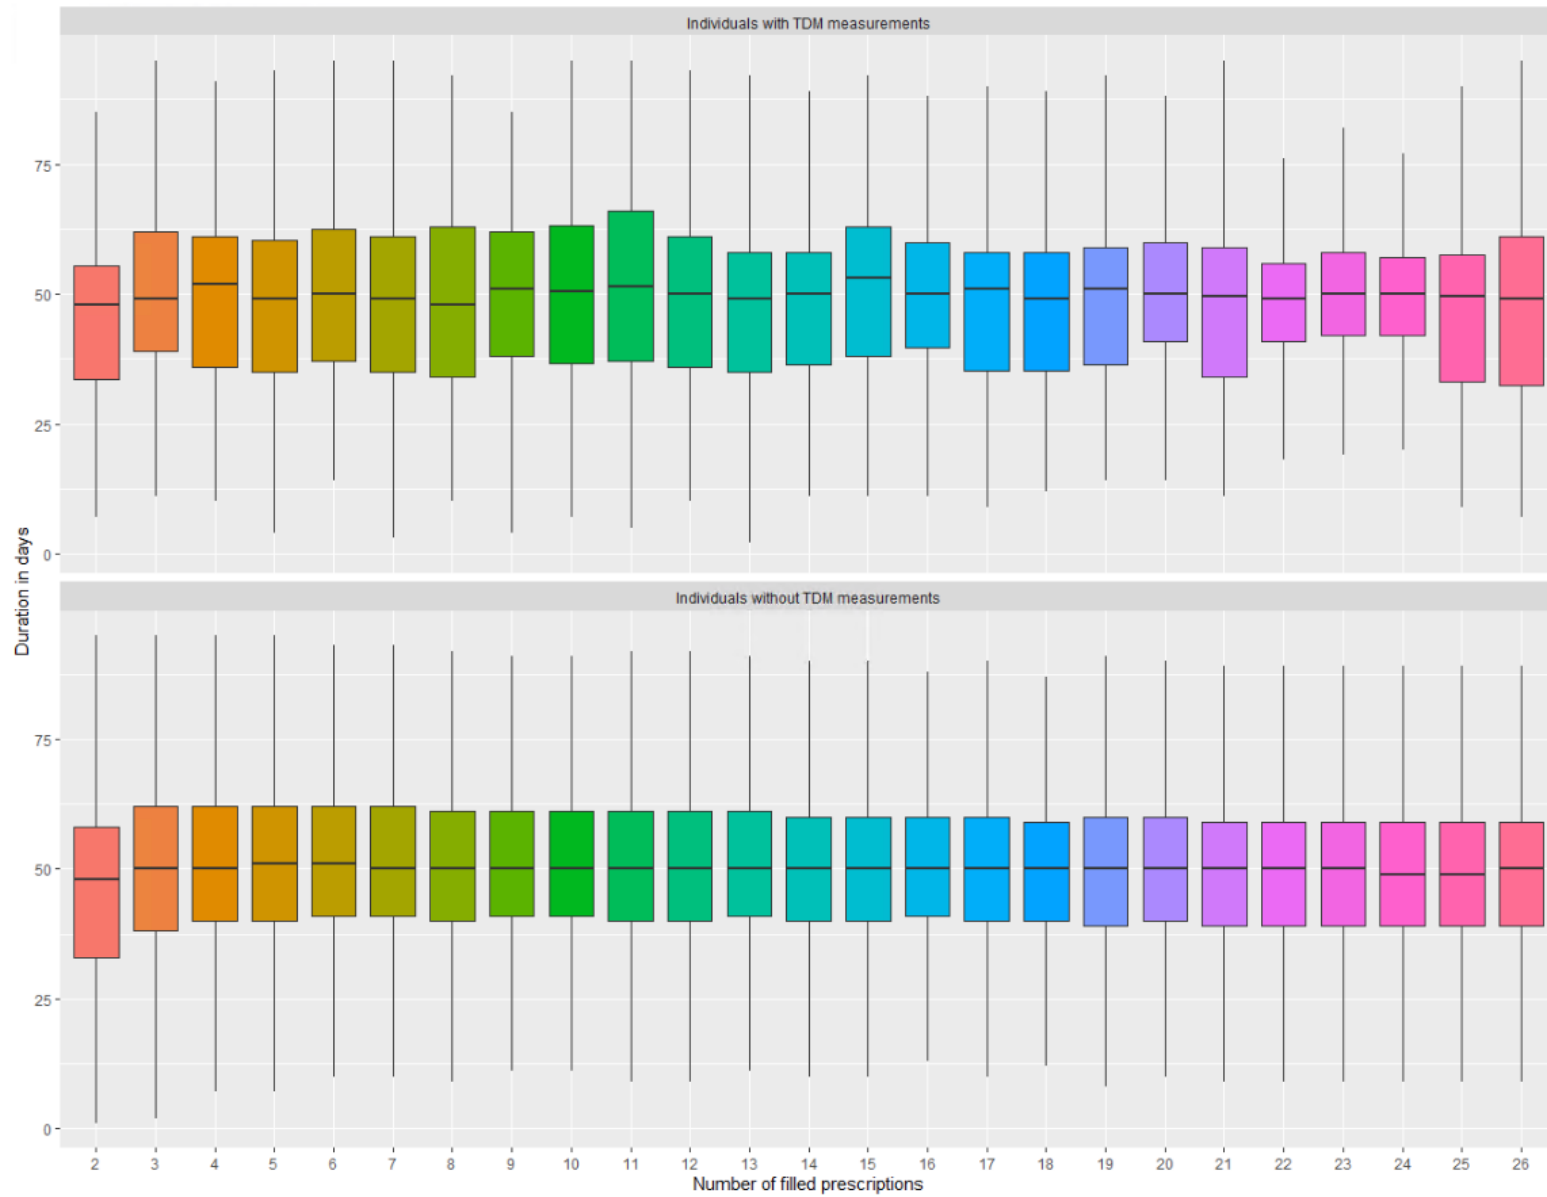

**Supplementary figure 13.** Median duration of the temporal distances between consecutive prescriptions for theophylline. *TDM* = *therapeutic drug monitoring*.

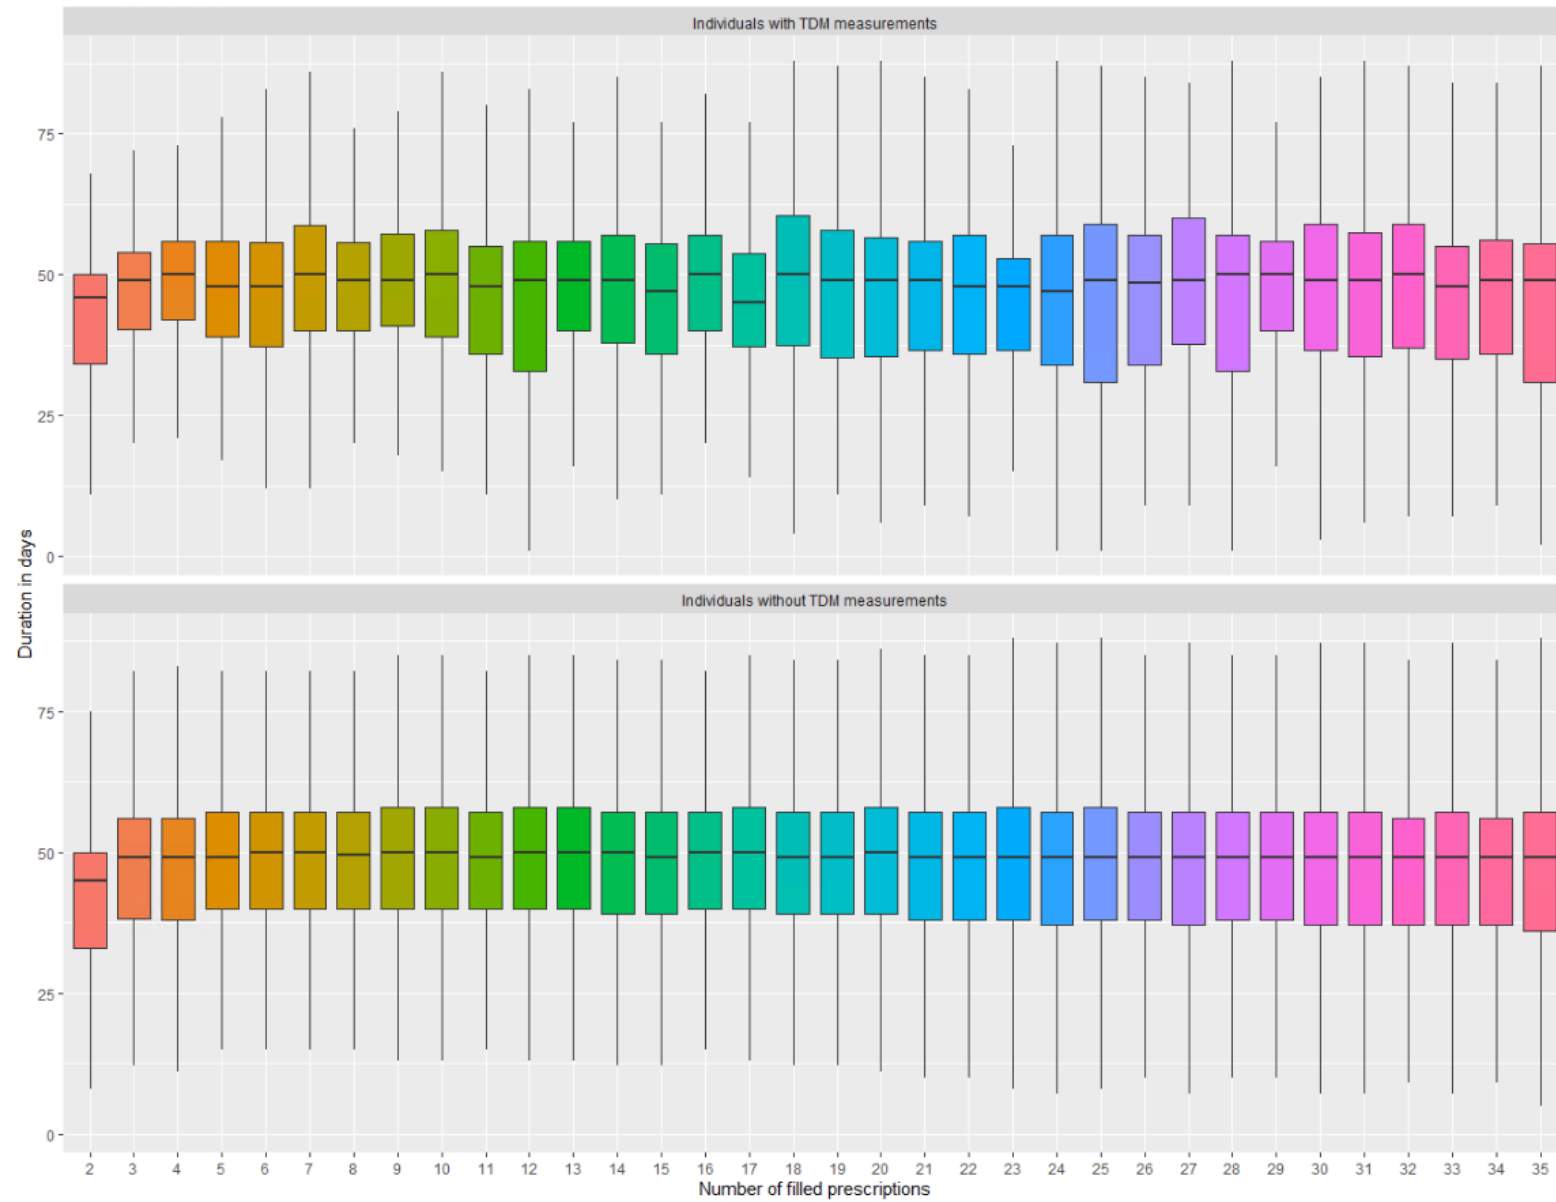

**Supplementary figure 14.** Median duration of the temporal distances between consecutive prescriptions for flecainide. *TDM = therapeutic drug monitoring.*

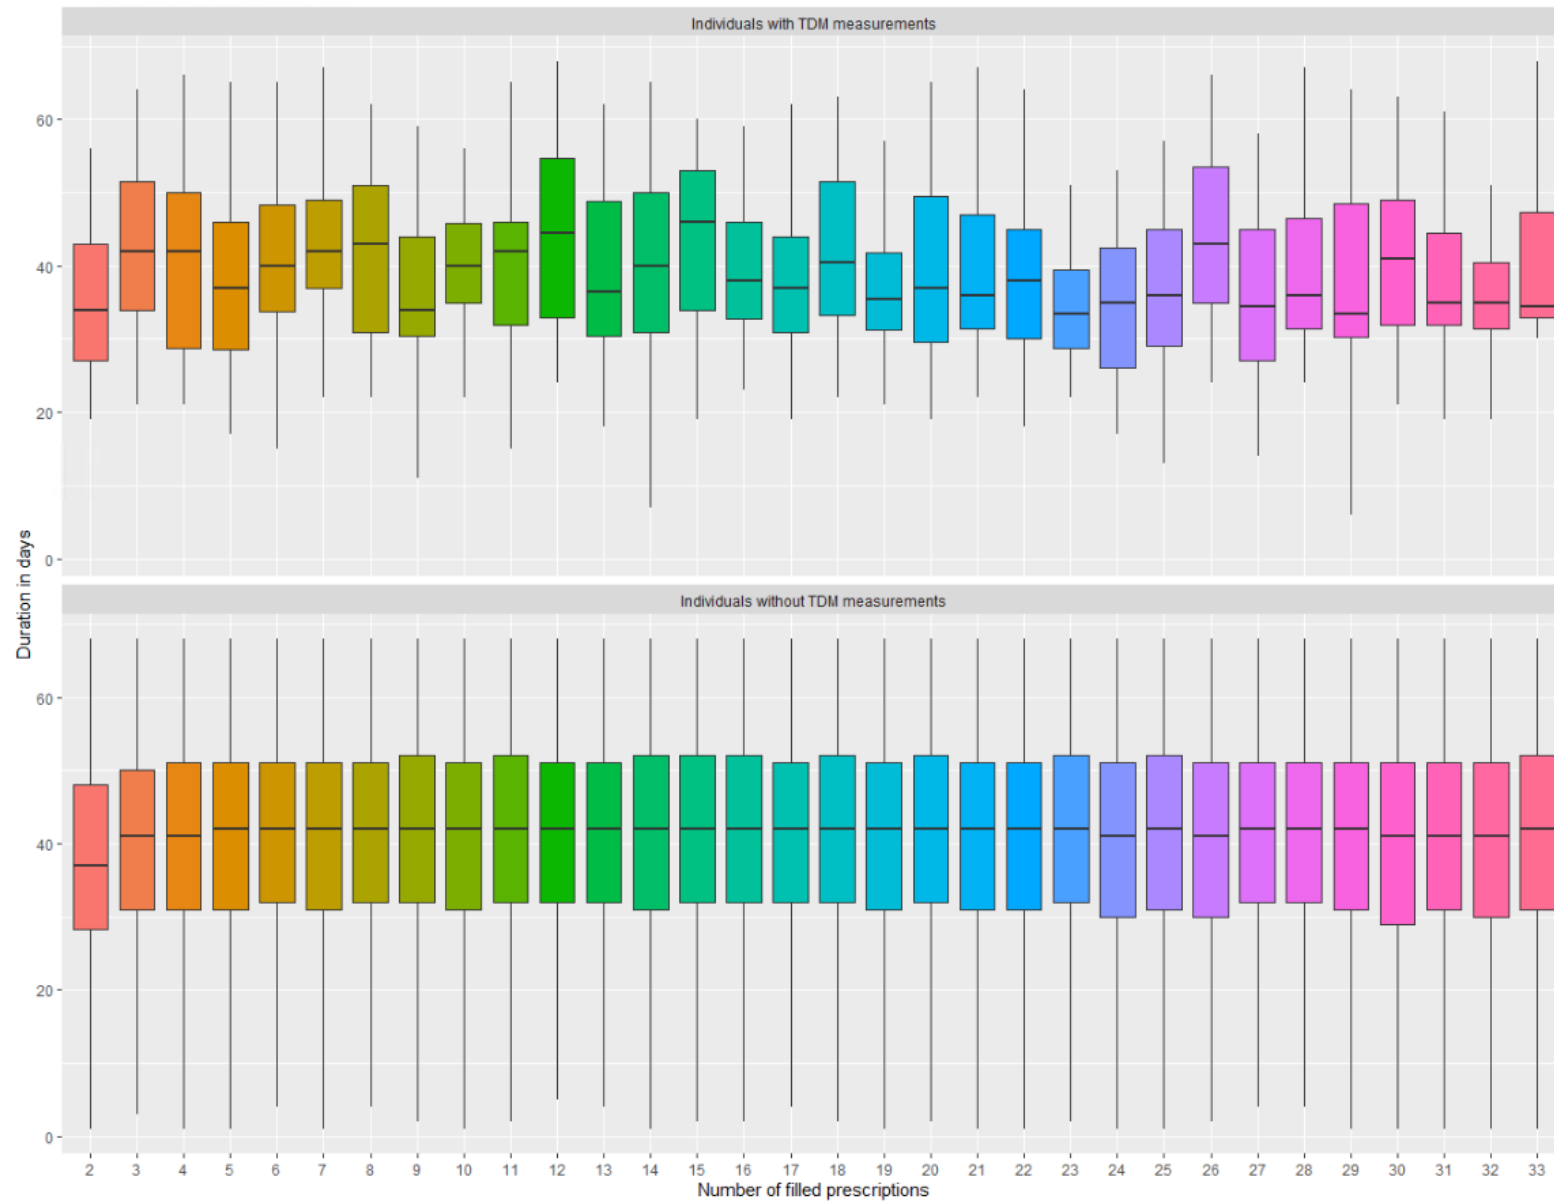

**Supplementary figure 15.** Median duration of the temporal distances between consecutive prescriptions for propafenone. *TDM = therapeutic drug monitoring.*

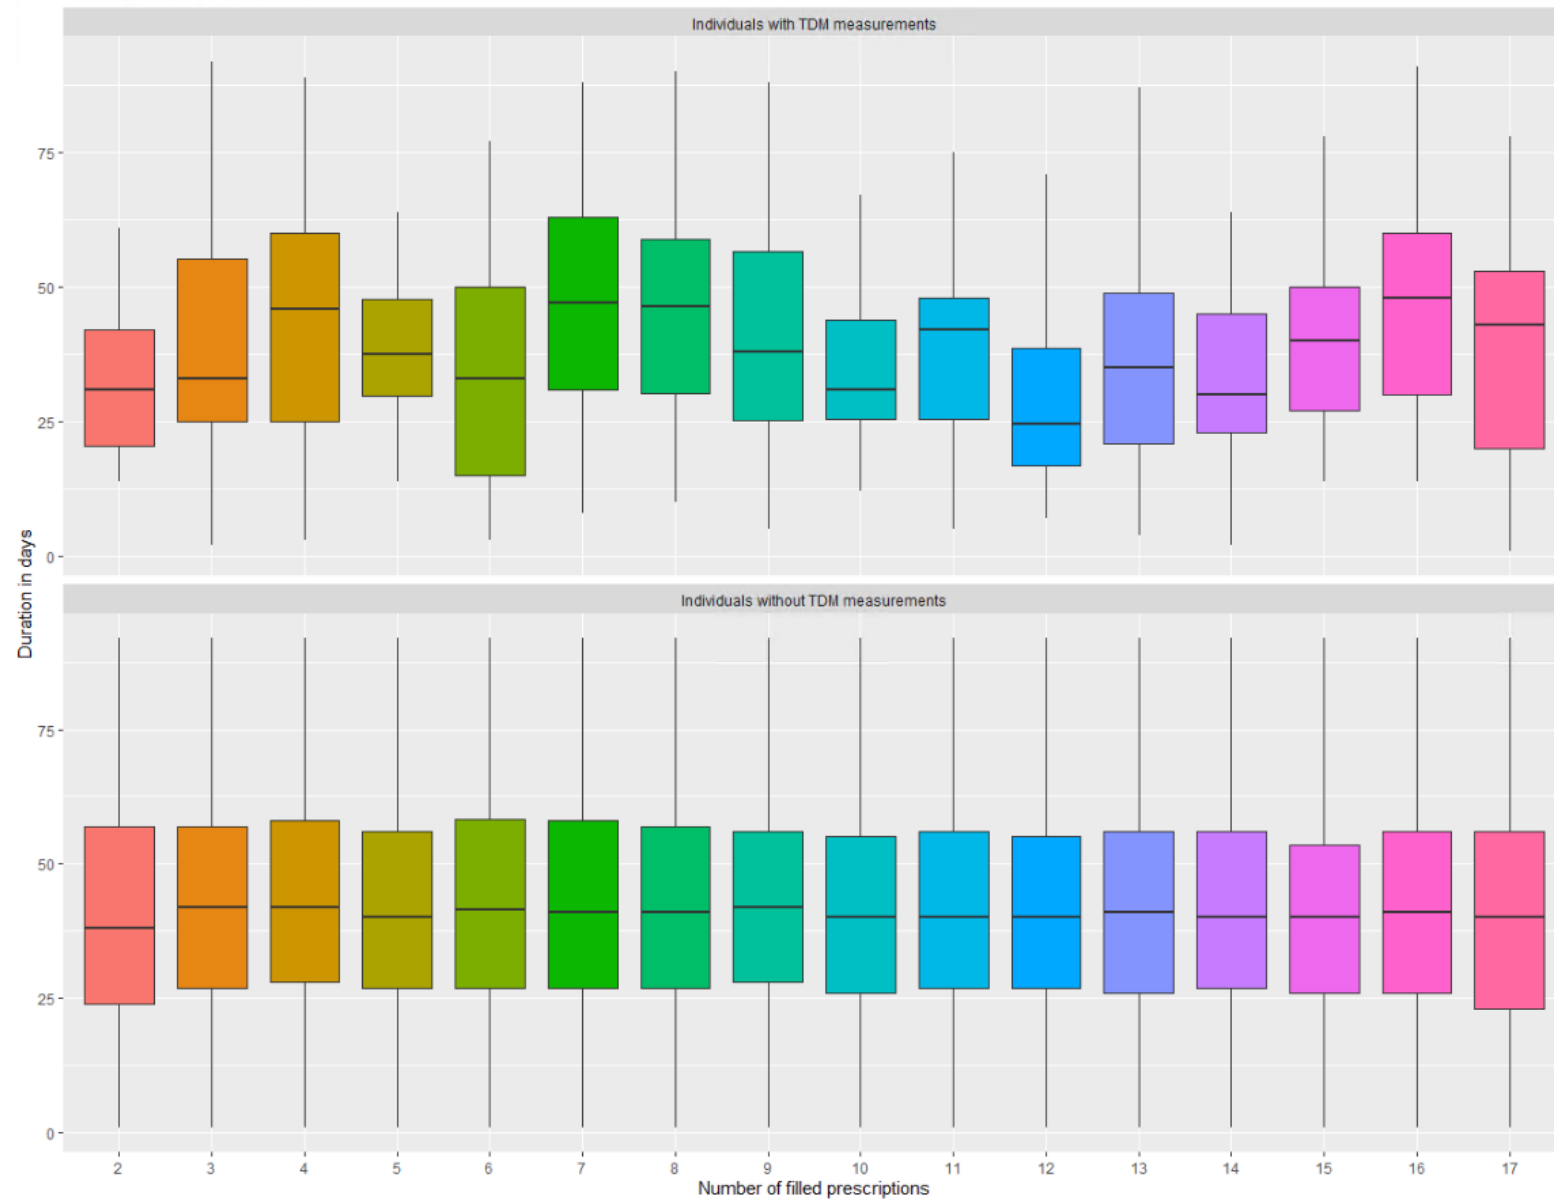

**Supplementary figure 16.** Median duration of the temporal distances between consecutive prescriptions for amitriptyline. *TDM = therapeutic drug monitoring.*

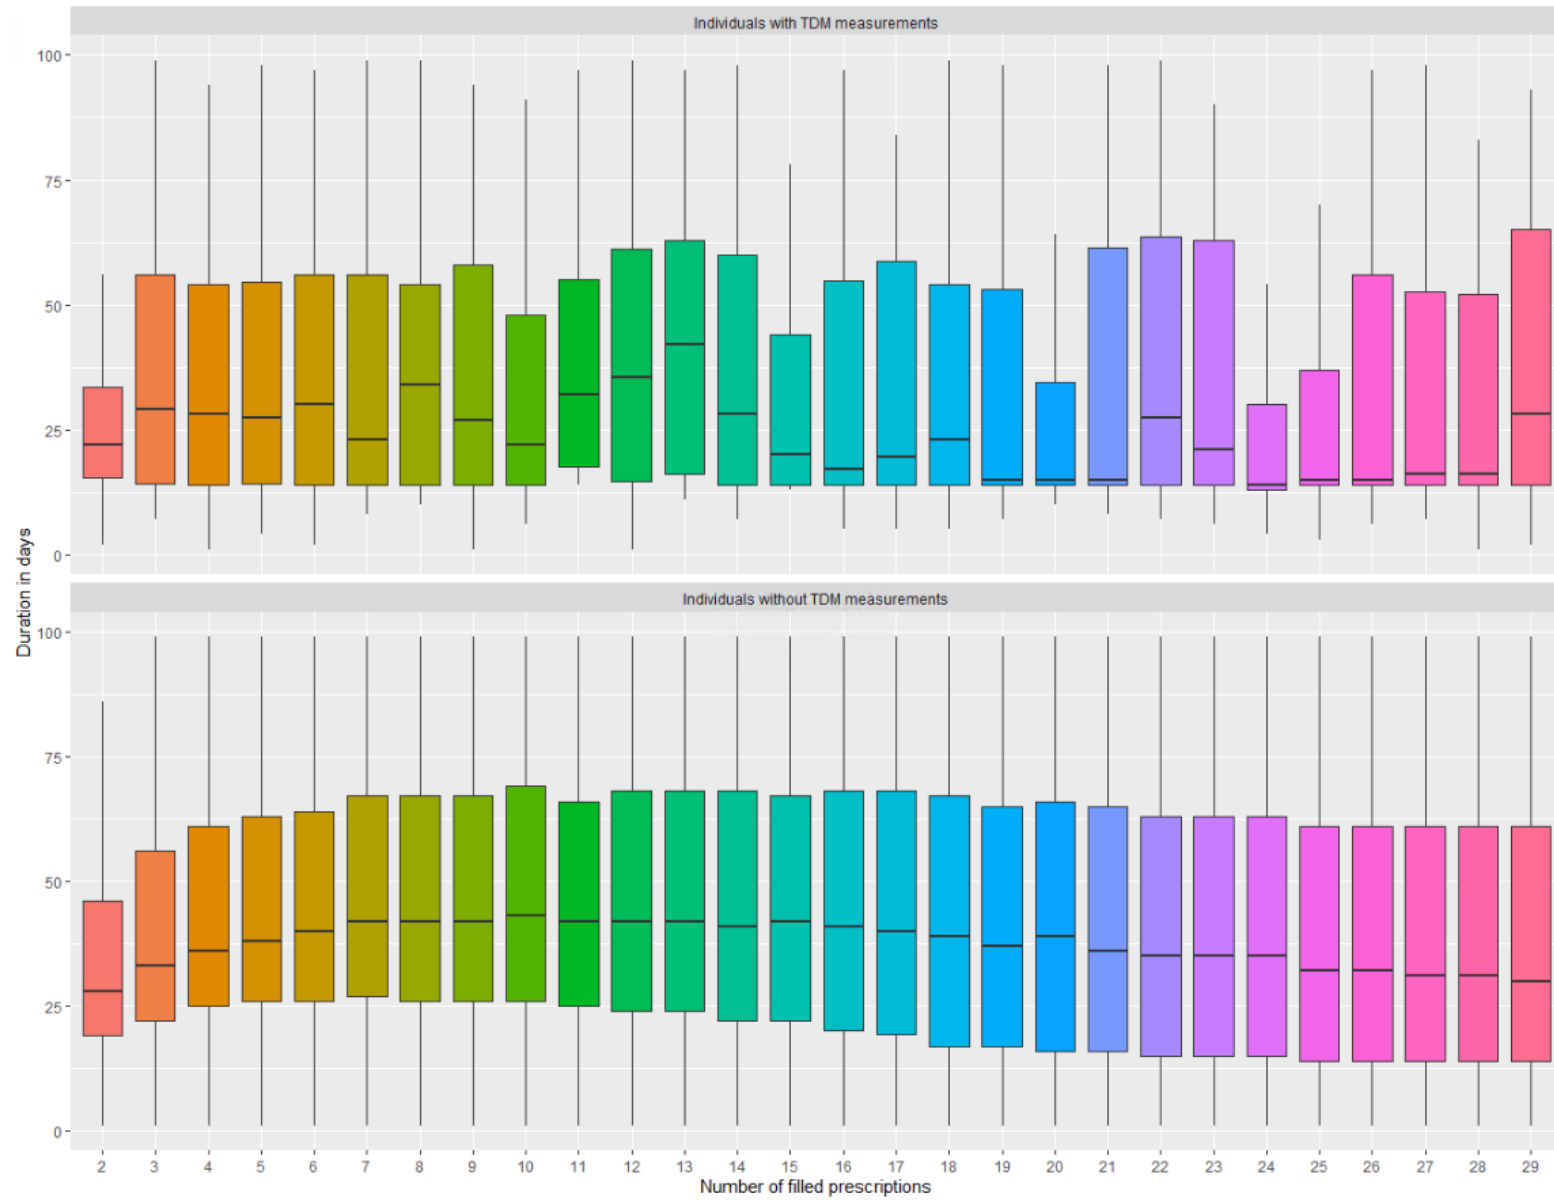

**Supplementary figure 17.** Median duration of the temporal distances between consecutive prescriptions for citalopram. *TDM = therapeutic drug monitoring.*

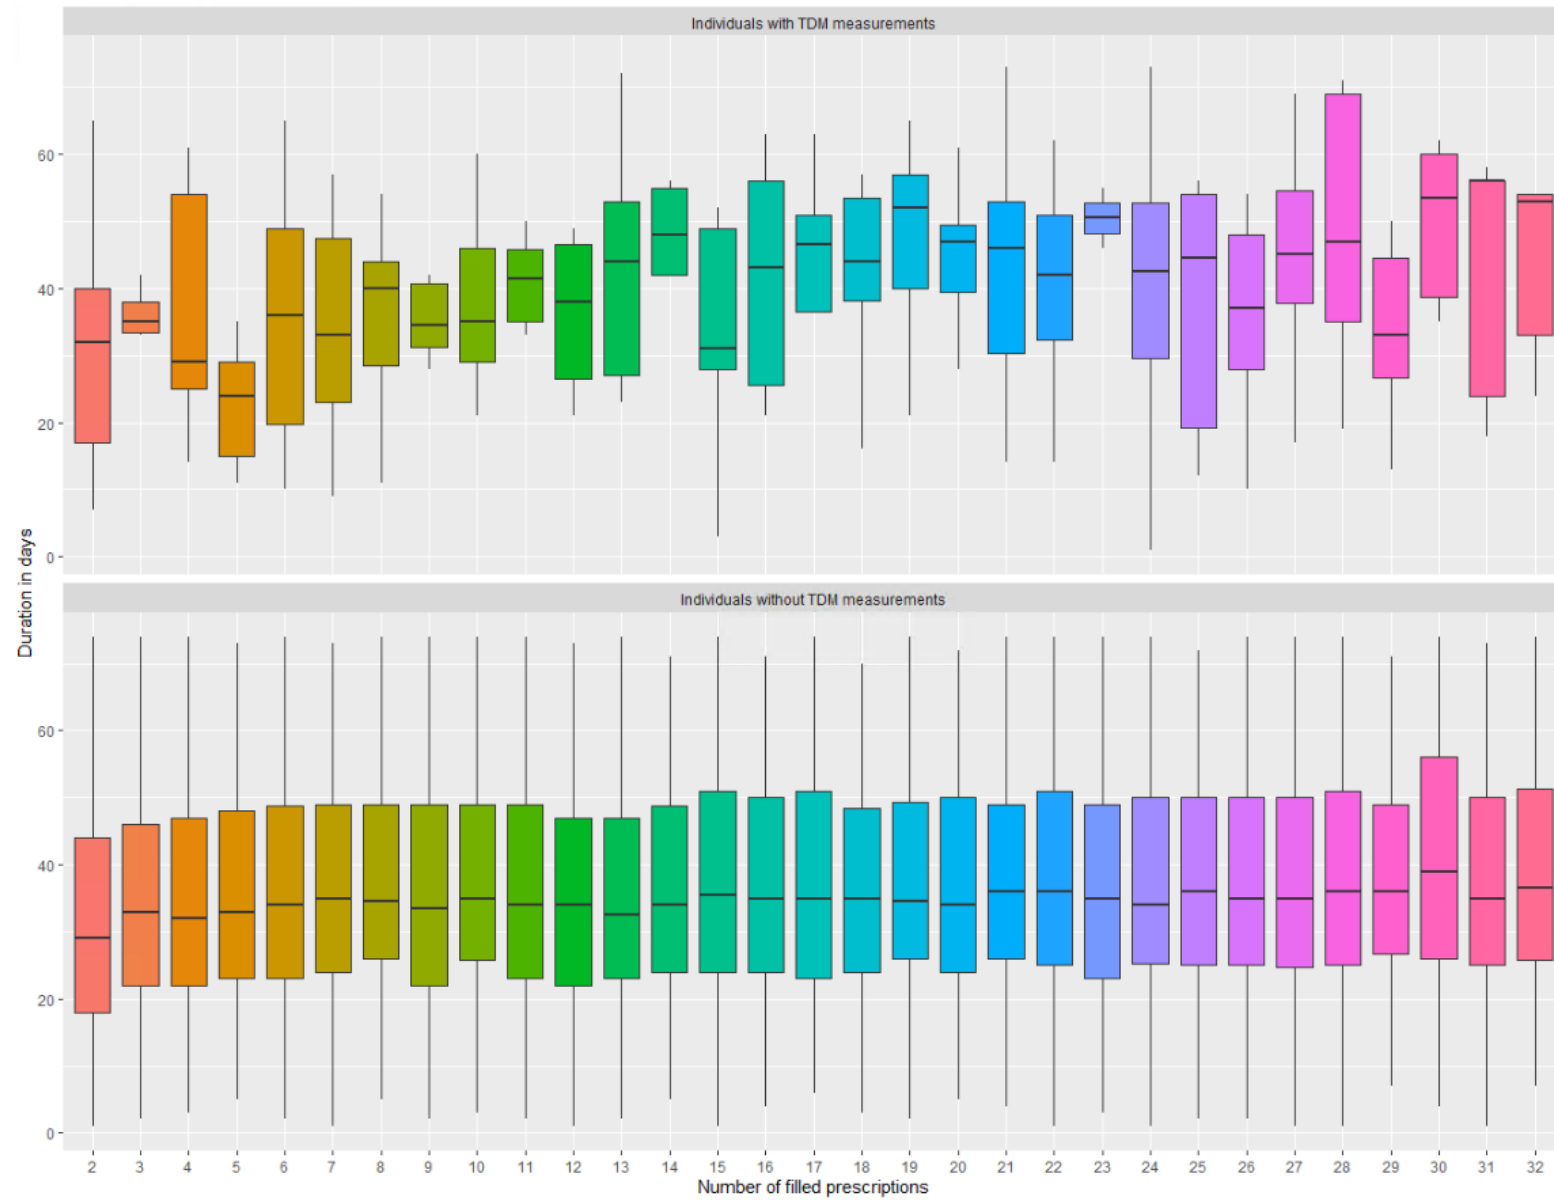

**Supplementary figure 18.** Median duration of the temporal distances between consecutive prescriptions for clomipramine. *TDM = therapeutic drug monitoring.*

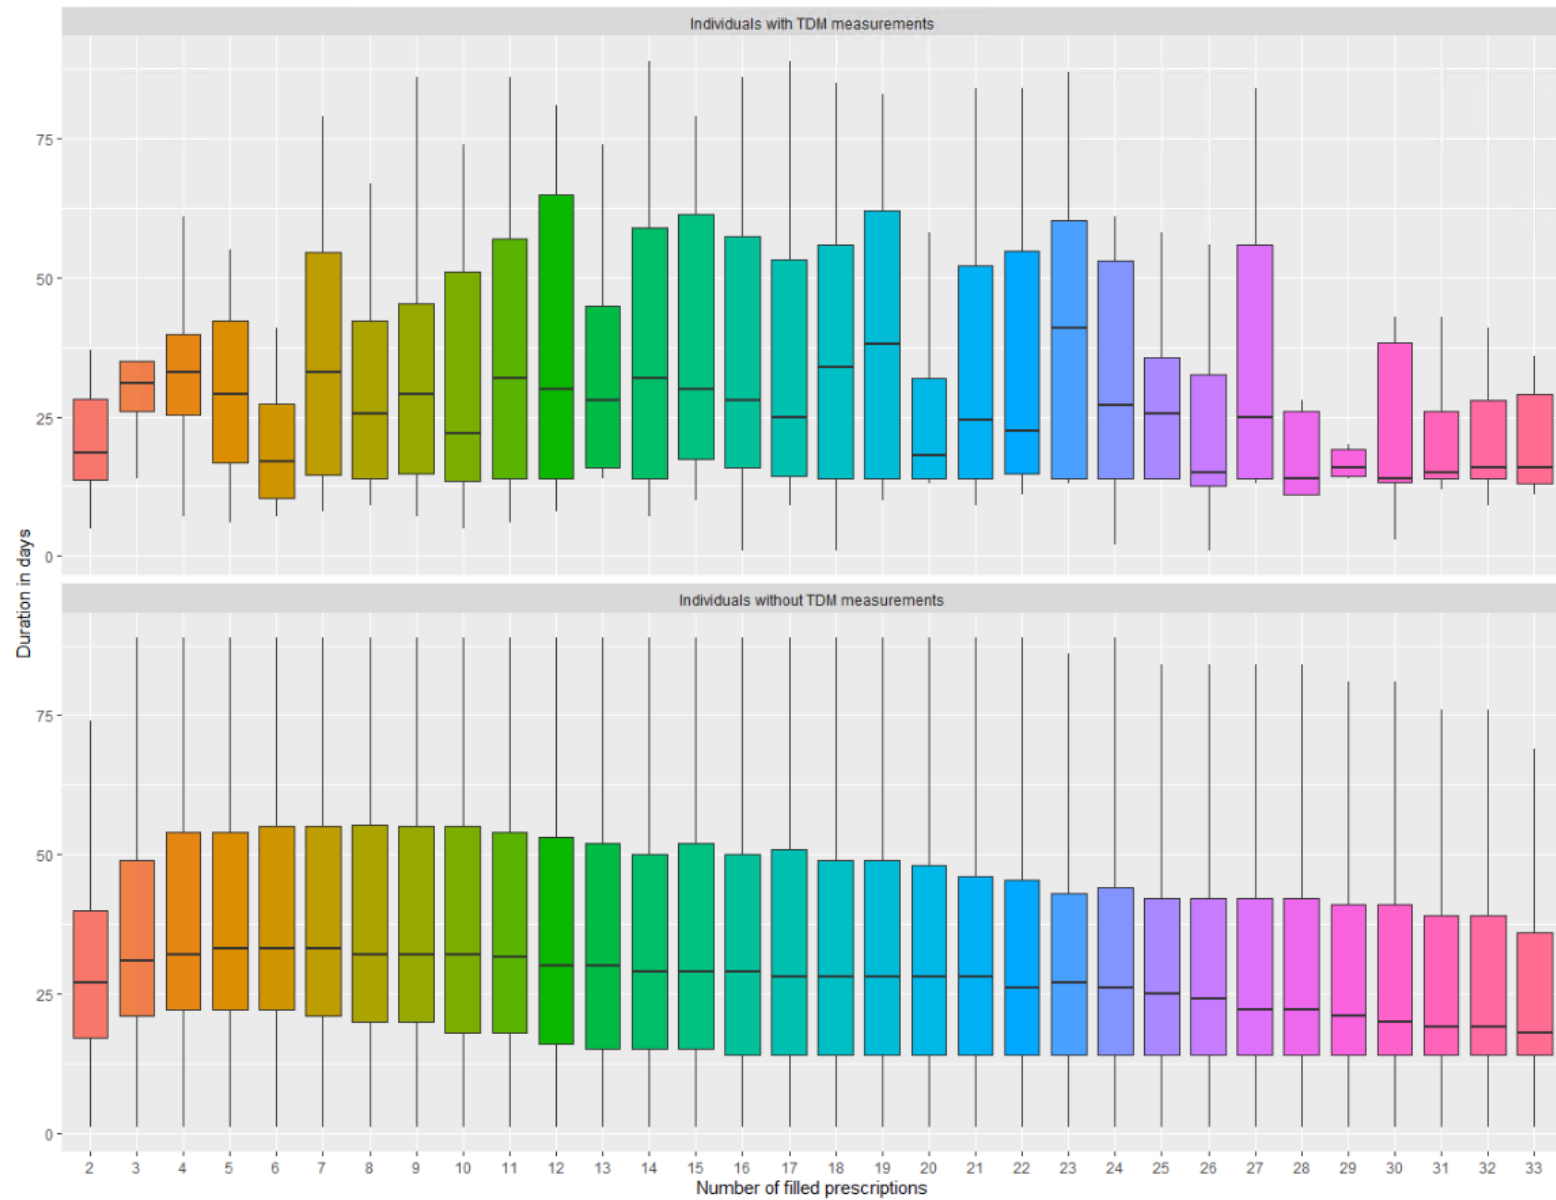

**Supplementary figure 19.** Median duration of the temporal distances between consecutive prescriptions for mirtazapine. *TDM = therapeutic drug monitoring.*



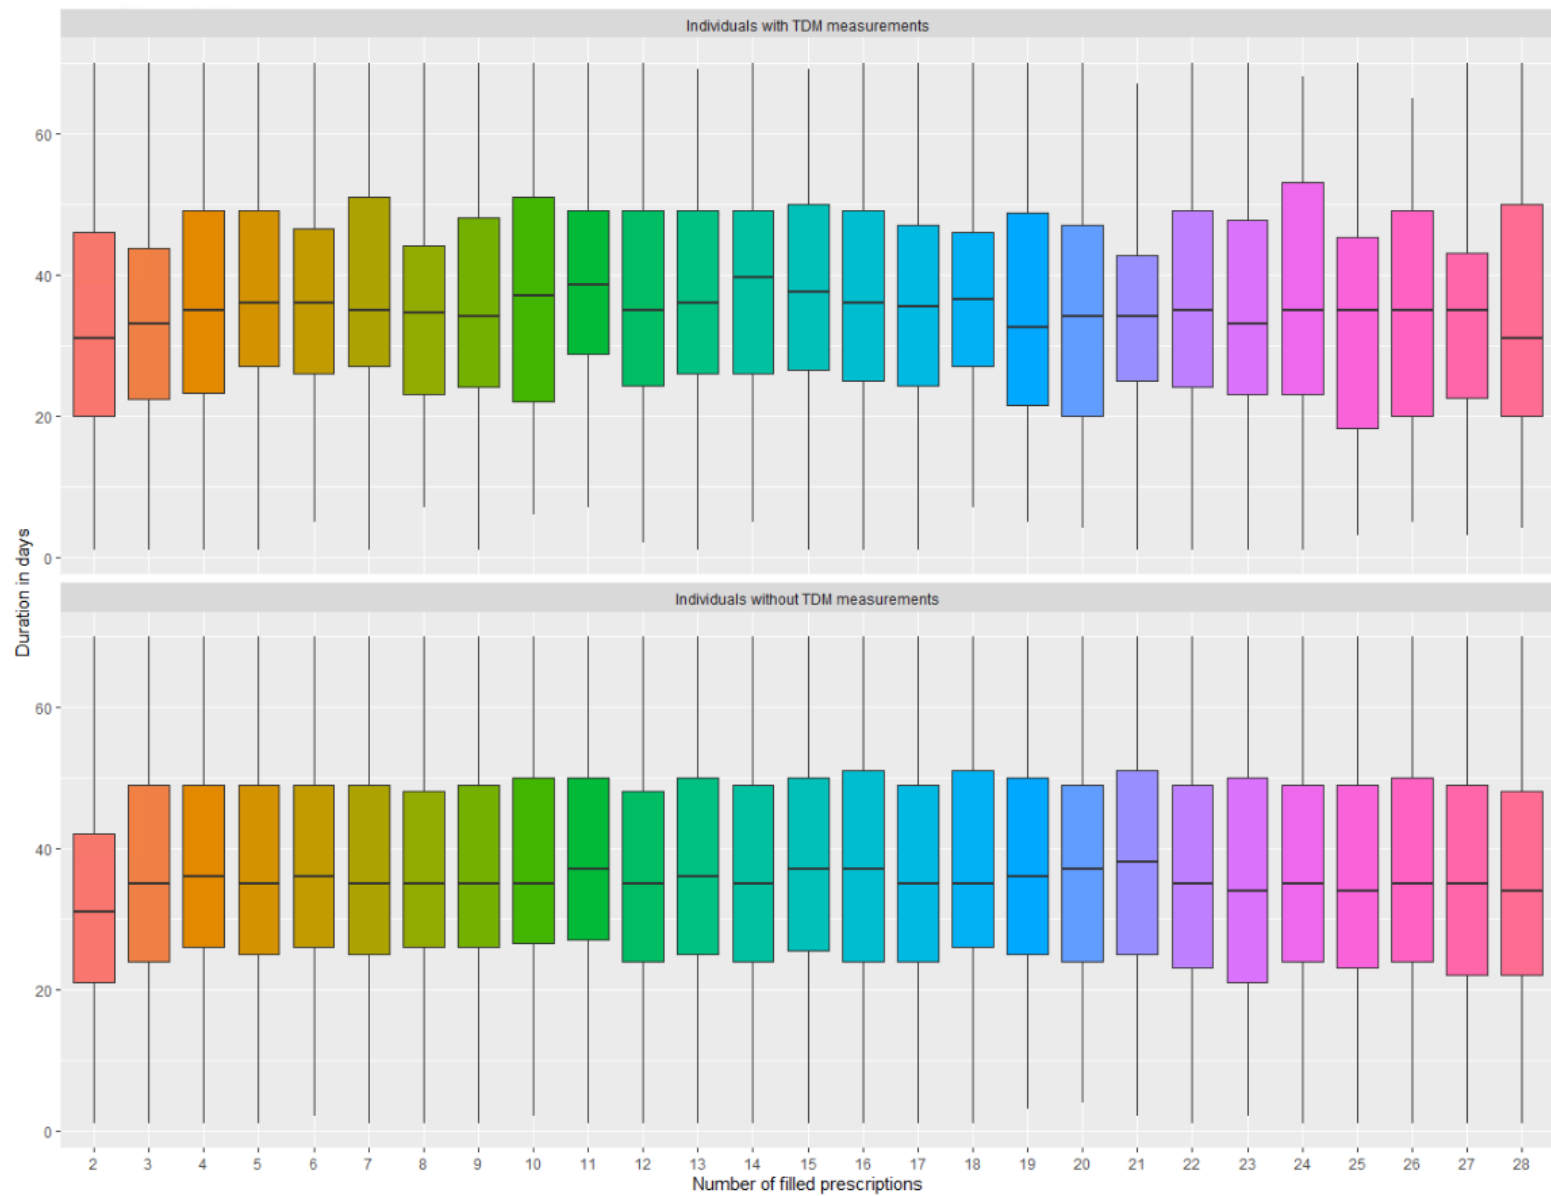

**Supplementary figure 20.** Median duration of the temporal distances between consecutive prescriptions for nortriptyline. *TDM* = therapeutic drug monitoring.
